# Supplementary material for: Synthesis, Characterization, and Non-Covalent Interactions of Palladium(II)-Amino Acid Complexes
Source: MDPI journal article supplement (doi:10.3390/molecules26144331), 2021-07-17
Supplement: s1 [file s1]

## Supplementary Material

# Synthesis, Characterization, and Non-Covalent Interactions of Palladium(II)-Amino Acid Complexes

David B. Hobart, Jr. <sup>1,2</sup>, Michael A. G. Berg <sup>1</sup>, Hannah M. Rogers <sup>1</sup> and Joseph S. Merola <sup>1,\*</sup>

<sup>1</sup> Department of Chemistry, Virginia Polytechnic Institute & State University, Blacksburg, VA 24061 USA

<sup>2</sup> Current Address: Air Liquide Advanced Materials, 197 Meister Ave., Branchburg, NJ 08876 USA

\* Correspondence: jmerola@vt.edu

| Contents:                                                                            | Page |
|--------------------------------------------------------------------------------------|------|
| A. Experimental data and all tables related to the crystal structure of complex (1)  | 2    |
| B. Experimental data and all tables related to the crystal structure of complex (2)  | 5    |
| C. Experimental data and all tables related to the crystal structure of complex (4)  | 9    |
| D. Experimental data and all tables related to the crystal structure of complex (15) | 13   |
| E. Experimental data and all tables related to the crystal structure of complex (16) | 16   |
| F. Experimental data and all tables related to the crystal structure of complex (17) | 21   |

## A. Complex (1) *trans*-bis-(alaninato)palladium(II)

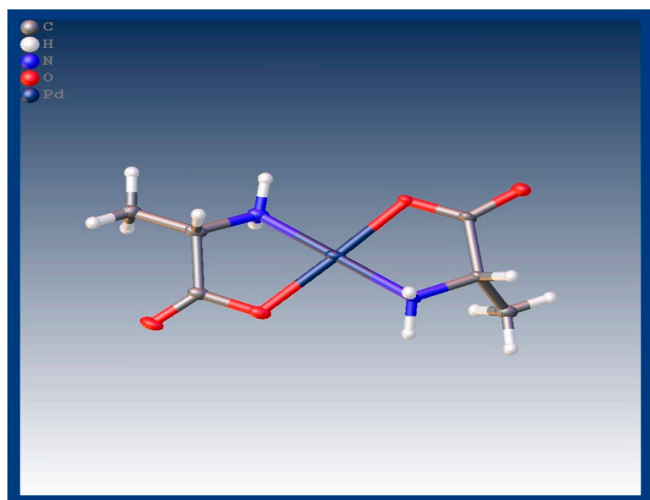

**Table S1.** Crystal data and structure refinement for Pd\_alanine.

|                                             |                                                                 |
|---------------------------------------------|-----------------------------------------------------------------|
| Identification code                         | Pd_alanine                                                      |
| Empirical formula                           | C <sub>6</sub> H <sub>12</sub> N <sub>2</sub> O <sub>4</sub> Pd |
| Formula weight                              | 282.58                                                          |
| Temperature/K                               | 99.8(3)                                                         |
| Crystal system                              | triclinic                                                       |
| Space group                                 | P1                                                              |
| a/Å                                         | 4.6540(5)                                                       |
| b/Å                                         | 5.1589(6)                                                       |
| c/Å                                         | 9.4786(9)                                                       |
| α/°                                         | 79.048(8)                                                       |
| β/°                                         | 85.410(8)                                                       |
| γ/°                                         | 75.629(10)                                                      |
| Volume/Å <sup>3</sup>                       | 216.31(4)                                                       |
| Z                                           | 1                                                               |
| Q <sub>calc</sub> /g/cm <sup>3</sup>        | 2.169                                                           |
| μ/mm <sup>-1</sup>                          | 2.129                                                           |
| F(000)                                      | 140.0                                                           |
| Crystal size/mm <sup>3</sup>                | 0.3 × 0.163 × 0.087                                             |
| Radiation                                   | Mo Kα (λ = 0.71073)                                             |
| 2θ range for data collection/°              | 8.286 to 64.628                                                 |
| Index ranges                                | −7 ≤ h ≤ 6, −7 ≤ k ≤ 7, −13 ≤ l ≤ 13                            |
| Reflections collected                       | 4326                                                            |
| Independent reflections                     | 2801 [R <sub>int</sub> = 0.0457, R <sub>sigma</sub> = 0.0975]   |
| Data/restraints/parameters                  | 2801/3/84                                                       |
| Goodness-of-fit on F <sup>2</sup>           | 0.988                                                           |
| Final R indexes [I ≥ 2σ (I)]                | R <sub>1</sub> = 0.0506, wR <sub>2</sub> = 0.0953               |
| Final R indexes [all data]                  | R <sub>1</sub> = 0.0587, wR <sub>2</sub> = 0.1017               |
| Largest diff. peak/hole / e Å <sup>-3</sup> | 1.82/−2.62                                                      |
| Flack parameter                             | −0.07(10)                                                       |

**Table S2.** Fractional Atomic Coordinates ( $\times 10^4$ ) and Equivalent Isotropic Displacement Parameters ( $\text{\AA}^2 \times 10^3$ ) for Pd\_alanine.  $U_{eq}$  is defined as 1/3 of the trace of the orthogonalised  $U_{ij}$  tensor.

| Atom | <i>x</i>  | <i>y</i> | <i>z</i> | $U_{eq}$  |
|------|-----------|----------|----------|-----------|
| Pd1  | 4817(8)   | 4777(7)  | 4742(5)  | 15.07(16) |
| O1   | 8590(30)  | 2620(30) | 3875(17) | 15.6(19)  |
| O2   | 11950(40) | 2960(40) | 2200(20) | 19(3)     |
| O3   | 1230(30)  | 6980(30) | 5547(16) | 12.9(17)  |
| O4   | -2090(40) | 6840(40) | 7430(20) | 18(3)     |
| N1   | 6090(40)  | 7850(40) | 3380(20) | 15.6(19)  |
| N2   | 3480(40)  | 1640(40) | 6060(20) | 12.9(17)  |
| C1   | 9610(40)  | 3920(40) | 2710(20) | 15.6(19)  |
| C2   | 7550(20)  | 6650(20) | 2119(14) | 15.6(19)  |
| C3   | 9120(20)  | 8500(20) | 1089(12) | 18.4(18)  |
| C4   | 90(40)    | 5750(40) | 6680(20) | 12.9(17)  |
| C5   | 1500(20)  | 2720(20) | 7235(13) | 12.9(17)  |
| C6   | 3190(20)  | 2440(20) | 8558(12) | 19.8(18)  |

**Table S3.** Anisotropic Displacement Parameters ( $\text{\AA}^2 \times 10^3$ ) for Pd\_alanine. The Anisotropic displacement factor exponent takes the form:  $-2\pi^2[h^2a^{*2}U_{11}+2hka^*b^*U_{12}+\dots]$ .

| Atom | $U_{11}$ | $U_{22}$ | $U_{33}$ | $U_{23}$  | $U_{13}$  | $U_{12}$ |
|------|----------|----------|----------|-----------|-----------|----------|
| Pd1  | 11.2(2)  | 10.4(2)  | 22.1(3)  | -2.71(18) | -1.45(19) | 0.41(16) |
| O1   | 11(3)    | 12(4)    | 23(4)    | -3(3)     | -2(3)     | -1(3)    |
| O2   | 11(5)    | 20(6)    | 24(7)    | -5(5)     | -3(4)     | 4(4)     |
| O3   | 10(3)    | 9(3)     | 18(4)    | -2(3)     | 1(2)      | 1(2)     |
| O4   | 17(6)    | 16(5)    | 16(6)    | -1(4)     | 1(4)      | 4(4)     |
| N1   | 11(3)    | 12(4)    | 23(4)    | -3(3)     | -2(3)     | -1(3)    |
| N2   | 10(3)    | 9(3)     | 18(4)    | -2(3)     | 1(2)      | 1(2)     |
| C1   | 11(3)    | 12(4)    | 23(4)    | -3(3)     | -2(3)     | -1(3)    |
| C2   | 11(3)    | 12(4)    | 23(4)    | -3(3)     | -2(3)     | -1(3)    |
| C3   | 17(4)    | 14(4)    | 21(5)    | -1(3)     | 0(4)      | 0(3)     |
| C4   | 10(3)    | 9(3)     | 18(4)    | -2(3)     | 1(2)      | 1(2)     |
| C5   | 10(3)    | 9(3)     | 18(4)    | -2(3)     | 1(2)      | 1(2)     |
| C6   | 16(4)    | 16(4)    | 23(5)    | -1(4)     | -2(4)     | 2(3)     |

**Table S4.** Bond Lengths for Pd\_alanine.

| Atom | Atom | Length/ $\text{\AA}$ | Atom | Atom | Length/ $\text{\AA}$ |
|------|------|----------------------|------|------|----------------------|
| Pd1  | O1   | 2.036(15)            | O4   | C4   | 1.27(3)              |
| Pd1  | O3   | 1.962(14)            | N1   | C2   | 1.49(2)              |
| Pd1  | N1   | 2.02(2)              | N2   | C5   | 1.49(2)              |
| Pd1  | N2   | 2.04(2)              | C1   | C2   | 1.53(2)              |
| O1   | C1   | 1.30(2)              | C2   | C3   | 1.509(15)            |
| O2   | C1   | 1.18(3)              | C4   | C5   | 1.54(2)              |
| O3   | C4   | 1.29(2)              | C5   | C6   | 1.498(14)            |

**Table S5.** Bond Angles for Pd\_alanine.

| Atom | Atom | Atom | Angle/ $^\circ$ | Atom | Atom | Atom | Angle/ $^\circ$ |
|------|------|------|-----------------|------|------|------|-----------------|
| O1   | Pd1  | N2   | 99.0(7)         | O2   | C1   | O1   | 120(2)          |
| O3   | Pd1  | O1   | 177.9(8)        | O2   | C1   | C2   | 125.9(19)       |
| O3   | Pd1  | N1   | 97.3(7)         | N1   | C2   | C1   | 106.9(15)       |
| O3   | Pd1  | N2   | 83.1(8)         | N1   | C2   | C3   | 113.6(11)       |

| Atom | Atom | Atom | Angle/°   | Atom | Atom | Atom | Angle/°   |
|------|------|------|-----------|------|------|------|-----------|
| N1   | Pd1  | O1   | 80.6(8)   | C3   | C2   | C1   | 112.8(11) |
| N1   | Pd1  | N2   | 178.1(10) | O3   | C4   | C5   | 119.1(16) |
| C1   | O1   | Pd1  | 114.6(14) | O4   | C4   | O3   | 125.2(18) |
| C4   | O3   | Pd1  | 114.8(13) | O4   | C4   | C5   | 115.7(16) |
| C2   | N1   | Pd1  | 105.6(12) | N2   | C5   | C4   | 107.5(14) |
| C5   | N2   | Pd1  | 109.0(12) | N2   | C5   | C6   | 111.4(10) |
| O1   | C1   | C2   | 114.0(17) | C6   | C5   | C4   | 110.0(11) |

Table S6. Torsion Angles for Pd\_alanine.

| A   | B  | C  | D  | Angle/°   | A  | B  | C  | D  | Angle/°   |
|-----|----|----|----|-----------|----|----|----|----|-----------|
| Pd1 | O1 | C1 | O2 | 172.5(18) | O1 | C1 | C2 | N1 | 35.8(18)  |
| Pd1 | O1 | C1 | C2 | -7.8(19)  | O1 | C1 | C2 | C3 | 161.3(13) |
| Pd1 | O3 | C4 | O4 | 174.5(19) | O2 | C1 | C2 | N1 | -145(2)   |
| Pd1 | O3 | C4 | C5 | -3(2)     | O2 | C1 | C2 | C3 | -19(3)    |
| Pd1 | N1 | C2 | C1 | -45.1(13) | O3 | C4 | C5 | N2 | -16(2)    |
| Pd1 | N1 | C2 | C3 | -170.1(8) | O3 | C4 | C5 | C6 | 105.7(17) |
| Pd1 | N2 | C5 | C4 | 25.4(14)  | O4 | C4 | C5 | N2 | 166.4(18) |
| Pd1 | N2 | C5 | C6 | -95.3(12) | O4 | C4 | C5 | C6 | -72(2)    |

Table S7. Hydrogen Atom Coordinates ( $\text{\AA} \times 10^4$ ) and Isotropic Displacement Parameters ( $\text{\AA}^2 \times 10^3$ ) for Pd\_alanine.

| Atom | x        | y        | z       | U(eq) |
|------|----------|----------|---------|-------|
| H1A  | 4525.21  | 9201.27  | 3115.37 | 19    |
| H1B  | 7353.54  | 8481.74  | 3799.42 | 19    |
| H2A  | 2504.5   | 857.52   | 5556.61 | 15    |
| H2B  | 5049.1   | 399.98   | 6426.45 | 15    |
| H2   | 6003.71  | 6289.37  | 1592.39 | 19    |
| H3A  | 10677.55 | 8860.58  | 1574.06 | 28    |
| H3B  | 7733.7   | 10178.51 | 749.27  | 28    |
| H3C  | 9962.14  | 7635.36  | 288.37  | 28    |
| H5   | -68.24   | 1728.35  | 7467.85 | 15    |
| H6A  | 4157.16  | 558.46   | 8864.9  | 30    |
| H6B  | 1850.7   | 3074.35  | 9308.89 | 30    |
| H6C  | 4657.78  | 3490.52  | 8347.49 | 30    |

## Experimental

Single crystals of  $\text{C}_6\text{H}_{12}\text{N}_2\text{O}_4\text{Pd}$  [**Pd\_alanine**] were grown by allowing an acetone/water solution to evaporate slowly. A suitable crystal was selected and mounted on a fiber on a Xcalibur, Sapphire3, Gemini ultra diffractometer. The crystal was kept at 99.8(3) K during data collection. Using Olex2 [1], the structure was solved with the XS [2] structure solution program using Direct Methods and refined with the XL [3] refinement package using Least Squares minimisation.

1. Dolomanov, O.V., Bourhis, L.J., Gildea, R.J., Howard, J.A.K. & Puschmann, H. (2009), J. Appl. Cryst. 42, 339-341.
2. Sheldrick, G.M. (2008). Acta Cryst. A64, 112-122.
3. Sheldrick, G.M. (2008). Acta Cryst. A64, 112-122.

## Crystal structure determination of [**Pd\_alanine**]

**Crystal Data** for  $\text{C}_6\text{H}_{12}\text{N}_2\text{O}_4\text{Pd}$  ( $M = 282.58$  g/mol): triclinic, space group P1 (no. 1),  $a = 4.6540(5)$  Å,  $b = 5.1589(6)$  Å,  $c = 9.4786(9)$  Å,  $\alpha = 79.048(8)^\circ$ ,  $\beta = 85.410(8)^\circ$ ,  $\gamma = 75.629(10)^\circ$ ,  $V = 216.31(4)$  Å<sup>3</sup>,  $Z = 1$ ,  $T = 99.8(3)$  K,  $\mu(\text{Mo K}\alpha) = 2.129$  mm<sup>-1</sup>,  $D_{\text{calc}} = 2.169$  g/cm<sup>3</sup>, 4326 reflections measured ( $8.286^\circ \leq 2\theta \leq 64.628^\circ$ ), 2801 unique ( $R_{\text{int}} = 0.0457$ ,  $R_{\text{sigma}} = 0.0975$ ) which were used in all calculations. The final  $R_1$  was 0.0506 ( $I > 2\sigma(I)$ ) and  $wR_2$  was 0.1017 (all data).

## Refinement model description

Number of restraints - 3, number of constraints - unknown.

## Details:

## 1. Fixed Uiso

At 1.2 times of:

All C(H) groups, All N(H,H) groups

At 1.5 times of:

All C(H,H,H) groups

## 2. Uiso/Uanis restraints and constraints

Uanis(N2) = Uanis(C5) = Uanis(C4) = Uanis(O3)

Uanis(O1) = Uanis(C1) = Uanis(C2) = Uanis(N1)

## 3.a Ternary CH refined with riding coordinates:

C2(H2), C5(H5)

## 3.b Secondary CH2 refined with riding coordinates:

N1(H1A,H1B), N2(H2A,H2B)

## 3.c Idealised Me refined as rotating group:

C3(H3A,H3B,H3C), C6(H6A,H6B,H6C)

## B. Complex (2) *cis*-bis-(valinato)palladium(II)

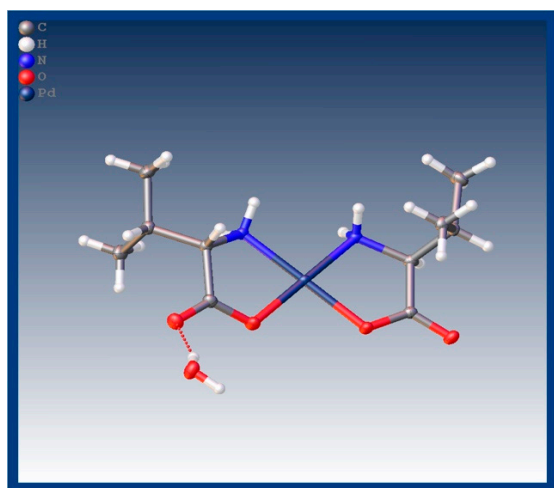

Table S1. Crystal data and structure refinement for valinepd.

| Identification code                  | valinepd                                                         |
|--------------------------------------|------------------------------------------------------------------|
| Empirical formula                    | C <sub>10</sub> H <sub>22</sub> N <sub>2</sub> O <sub>5</sub> Pd |
| Formula weight                       | 356.69                                                           |
| Temperature/K                        | 100.05(10)                                                       |
| Crystal system                       | orthorhombic                                                     |
| Space group                          | P2 <sub>1</sub> 2 <sub>1</sub> 2 <sub>1</sub>                    |
| a/Å                                  | 9.57160(10)                                                      |
| b/Å                                  | 9.61940(10)                                                      |
| c/Å                                  | 15.22950(10)                                                     |
| α/°                                  | 90                                                               |
| β/°                                  | 90                                                               |
| γ/°                                  | 90                                                               |
| Volume/Å <sup>3</sup>                | 1402.23(2)                                                       |
| Z                                    | 4                                                                |
| ρ <sub>calc</sub> /g/cm <sup>3</sup> | 1.690                                                            |
| μ/mm <sup>-1</sup>                   | 1.338                                                            |
| F(000)                               | 728.0                                                            |
| Crystal size/mm <sup>3</sup>         | 0.263 × 0.197 × 0.144                                            |
| Radiation                            | Mo Kα (λ = 0.71073)                                              |
| 2θ range for data collection/°       | 8.474 to 65.308                                                  |
| Index ranges                         | -14 ≤ h ≤ 14, -14 ≤ k ≤ 14, -22 ≤ l ≤ 22                         |
| Reflections collected                | 27728                                                            |
| Independent reflections              | 4869 [R <sub>int</sub> = 0.0315, R <sub>sigma</sub> = 0.0178]    |
| Data/restraints/parameters           | 4869/0/170                                                       |

|                                                |                                  |
|------------------------------------------------|----------------------------------|
| Goodness-of-fit on $F^2$                       | 1.121                            |
| Final R indexes [ $I \geq 2\sigma(I)$ ]        | $R_1 = 0.0168$ , $wR_2 = 0.0395$ |
| Final R indexes [all data]                     | $R_1 = 0.0172$ , $wR_2 = 0.0397$ |
| Largest diff. peak/hole / $e \text{ \AA}^{-3}$ | 0.63/-0.62                       |
| Flack parameter                                | -0.024(8)                        |

**Table S2.** Fractional Atomic Coordinates ( $\times 10^4$ ) and Equivalent Isotropic Displacement Parameters ( $\text{\AA}^2 \times 10^3$ ) for valinepd.  $U_{eq}$  is defined as 1/3 of the trace of the orthogonalised  $U_{ij}$  tensor.

| Atom | x           | y           | z           | $U_{eq}$  |
|------|-------------|-------------|-------------|-----------|
| Pd1  | 5391.9 (2)  | 3952.7 (2)  | 6631.6 (2)  | 11.54 (4) |
| O1   | 4672.2 (16) | 2814.8 (14) | 7647.9 (9)  | 15.6 (2)  |
| O2   | 3022.6 (16) | 2743.4 (15) | 8675.3 (10) | 17.4 (3)  |
| O3   | 6958.2 (16) | 2663.1 (16) | 6313.2 (10) | 18.5 (3)  |
| O4   | 8439.7 (16) | 2158.6 (16) | 5233.9 (11) | 19.8 (3)  |
| N1   | 3827.9 (17) | 5250.1 (16) | 6957.2 (10) | 12.3 (3)  |
| N2   | 6112.8 (17) | 5053.1 (16) | 5608.7 (10) | 12.5 (3)  |
| C1   | 3580.9 (19) | 3313.4 (19) | 8039.0 (12) | 13.0 (3)  |
| C2   | 2962 (2)    | 4673.6 (19) | 7689.2 (12) | 12.9 (3)  |
| C3   | 1433.7 (19) | 4437 (2)    | 7413.8 (13) | 14.5 (3)  |
| C4   | 1318 (2)    | 3354 (2)    | 6684.6 (14) | 17.9 (3)  |
| C5   | 740 (2)     | 5811 (2)    | 7155.4 (15) | 22.7 (4)  |
| C6   | 7506 (2)    | 2891.3 (19) | 5550.3 (13) | 14.9 (3)  |
| C7   | 6887.5 (18) | 4093.0 (19) | 5014.3 (12) | 13.2 (3)  |
| C8   | 7945 (2)    | 4830 (2)    | 4414.8 (13) | 16.0 (3)  |
| C9   | 7208 (2)    | 5892 (3)    | 3832.1 (14) | 23.8 (4)  |
| C10  | 9135 (2)    | 5487 (2)    | 4932.7 (15) | 20.6 (4)  |
| O1W  | 8330.0 (17) | -659.5 (15) | 4998.8 (11) | 20.1 (3)  |

**Table S3.** Anisotropic Displacement Parameters ( $\text{\AA}^2 \times 10^3$ ) for valinepd. The Anisotropic displacement factor exponent takes the form:  $-2\pi^2[h^2a^{*2}U_{11}+2hka^*b^*U_{12}+\dots]$ .

| Atom | $U_{11}$ | $U_{22}$ | $U_{33}$ | $U_{23}$ | $U_{13}$ | $U_{12}$ |
|------|----------|----------|----------|----------|----------|----------|
| Pd1  | 12.15(5) | 9.94(5)  | 12.53(5) | 1.77(4)  | 0.19(5)  | 0.84(5)  |
| O1   | 16.4(6)  | 13.8(6)  | 16.5(6)  | 4.5(4)   | 3.5(5)   | 3.7(5)   |
| O2   | 21.9(7)  | 15.3(6)  | 15.0(6)  | 3.5(5)   | 4.1(5)   | 2.5(5)   |
| O3   | 19.1(7)  | 16.1(6)  | 20.4(7)  | 4.6(5)   | 4.7(5)   | 6.1(5)   |
| O4   | 19.0(7)  | 15.9(6)  | 24.6(7)  | -1.1(6)  | 3.5(6)   | 3.8(5)   |
| N1   | 12.7(6)  | 9.8(6)   | 14.3(6)  | 1.4(5)   | -0.7(5)  | 0.1(5)   |
| N2   | 13.4(6)  | 10.0(6)  | 14.2(6)  | 1.4(5)   | 1.2(6)   | -0.5(5)  |
| C1   | 14.8(8)  | 11.3(7)  | 12.9(7)  | 0.3(6)   | -1.0(6)  | 0.1(6)   |
| C2   | 15.5(8)  | 11.5(7)  | 11.7(7)  | -0.5(6)  | -0.7(6)  | 0.9(6)   |
| C3   | 12.3(8)  | 16.5(8)  | 14.8(8)  | 0.8(6)   | 1.5(6)   | 0.8(6)   |
| C4   | 17.2(8)  | 16.8(8)  | 19.7(8)  | 0.5(7)   | -1.5(8)  | -4.3(6)  |
| C5   | 20.1(9)  | 22.7(10) | 25.3(9)  | -0.8(8)  | -1.2(7)  | 8.2(7)   |
| C6   | 14.4(8)  | 11.1(8)  | 19.2(9)  | -0.5(6)  | 0.1(7)   | 1.0(6)   |
| C7   | 13.7(7)  | 11.9(7)  | 14.1(7)  | 0.1(6)   | 0.7(6)   | 0.4(6)   |
| C8   | 15.1(8)  | 17.2(8)  | 15.7(8)  | 0.7(7)   | 1.8(7)   | 0.1(7)   |
| C9   | 22.0(9)  | 29.1(11) | 20.2(9)  | 9.6(9)   | 0.4(7)   | 0.6(9)   |
| C10  | 16.7(8)  | 21.7(9)  | 23.5(10) | 3.1(8)   | -0.3(7)  | -4.2(7)  |
| O1W  | 25.1(7)  | 15.5(6)  | 19.6(7)  | 0.5(5)   | 8.1(6)   | -0.5(5)  |

**Table S4.** Bond Lengths for valinepd.

| Atom | Atom | Length/Å    | Atom | Atom | Length/Å  |
|------|------|-------------|------|------|-----------|
| Pd1  | O1   | 2.0170 (13) | N2   | C7   | 1.491 (2) |
| Pd1  | O3   | 2.0054 (15) | C1   | C2   | 1.532 (3) |
| Pd1  | N1   | 2.0110 (16) | C2   | C3   | 1.539 (3) |
| Pd1  | N2   | 2.0058 (15) | C3   | C4   | 1.527 (3) |
| O1   | C1   | 1.295 (2)   | C3   | C5   | 1.531 (3) |
| O2   | C1   | 1.235 (2)   | C6   | C7   | 1.534 (3) |
| O3   | C6   | 1.293 (2)   | C7   | C8   | 1.537 (3) |
| O4   | C6   | 1.236 (2)   | C8   | C9   | 1.526 (3) |
| N1   | C2   | 1.495 (2)   | C8   | C10  | 1.523 (3) |

Table S5. Bond Angles for valinepd.

| Atom | Atom | Atom | Angle/°     | Atom | Atom | Atom | Angle/°     |
|------|------|------|-------------|------|------|------|-------------|
| O3   | Pd1  | O1   | 96.03 (6)   | N1   | C2   | C3   | 112.24 (15) |
| O3   | Pd1  | N1   | 179.65 (7)  | C1   | C2   | C3   | 109.63 (15) |
| O3   | Pd1  | N2   | 83.19 (6)   | C4   | C3   | C2   | 111.59 (15) |
| N1   | Pd1  | O1   | 83.88 (6)   | C4   | C3   | C5   | 111.78 (17) |
| N2   | Pd1  | O1   | 178.98 (6)  | C5   | C3   | C2   | 110.78 (16) |
| N2   | Pd1  | N1   | 96.90 (6)   | O3   | C6   | C7   | 116.72 (16) |
| C1   | O1   | Pd1  | 115.31 (12) | O4   | C6   | O3   | 123.12 (18) |
| C6   | O3   | Pd1  | 114.53 (12) | O4   | C6   | C7   | 120.08 (18) |
| C2   | N1   | Pd1  | 111.47 (11) | N2   | C7   | C6   | 109.61 (15) |
| C7   | N2   | Pd1  | 108.41 (11) | N2   | C7   | C8   | 113.75 (15) |
| O1   | C1   | C2   | 117.93 (16) | C6   | C7   | C8   | 114.19 (15) |
| O2   | C1   | O1   | 123.07 (17) | C9   | C8   | C7   | 110.48 (16) |
| O2   | C1   | C2   | 119.00 (17) | C10  | C8   | C7   | 112.11 (16) |
| N1   | C2   | C1   | 111.21 (15) | C10  | C8   | C9   | 111.66 (18) |

Table S6. Hydrogen Bonds for valinepd.

| D   | H    | A                | d(D-H)/Å | d(H-A)/Å | d(D-A)/Å  | D-H-A/° |
|-----|------|------------------|----------|----------|-----------|---------|
| N2  | H2A  | O1W <sup>1</sup> | 0.89     | 2.06     | 2.879 (2) | 153.6   |
| O1W | H1WA | O4               | 0.85     | 1.92     | 2.736 (2) | 162.1   |
| O1W | H1WB | O2 <sup>2</sup>  | 0.85     | 2.00     | 2.848 (2) | 175.7   |

<sup>1</sup>-1/2+X,1/2-Y,1-Z; <sup>2</sup>1-X,-1/2+Y,3/2-Z.

Table S7. Torsion Angles for valinepd.

| A   | B  | C  | D  | Angle/°      | A  | B  | C  | D   | Angle/°      |
|-----|----|----|----|--------------|----|----|----|-----|--------------|
| Pd1 | O1 | C1 | O2 | -179.49 (15) | O3 | C6 | C7 | N2  | 19.6 (2)     |
| Pd1 | O1 | C1 | C2 | 0.6 (2)      | O3 | C6 | C7 | C8  | 148.52 (18)  |
| Pd1 | O3 | C6 | O4 | -176.79 (15) | O4 | C6 | C7 | N2  | -163.47 (17) |
| Pd1 | O3 | C6 | C7 | 0.1 (2)      | O4 | C6 | C7 | C8  | -34.5 (2)    |
| Pd1 | N1 | C2 | C1 | 4.79 (18)    | N1 | C2 | C3 | C4  | 63.2 (2)     |
| Pd1 | N1 | C2 | C3 | -118.44 (14) | N1 | C2 | C3 | C5  | -62.0 (2)    |
| Pd1 | N2 | C7 | C6 | -28.66 (16)  | N2 | C7 | C8 | C9  | -59.7 (2)    |
| Pd1 | N2 | C7 | C8 | -157.86 (12) | N2 | C7 | C8 | C10 | 65.5 (2)     |
| O1  | C1 | C2 | N1 | -3.6 (2)     | C1 | C2 | C3 | C4  | -60.9 (2)    |
| O1  | C1 | C2 | C3 | 121.08 (18)  | C1 | C2 | C3 | C5  | 173.85 (16)  |
| O2  | C1 | C2 | N1 | 176.44 (17)  | C6 | C7 | C8 | C9  | 173.44 (17)  |
| O2  | C1 | C2 | C3 | -58.9 (2)    | C6 | C7 | C8 | C10 | -61.3 (2)    |

Table S8. Hydrogen Atom Coordinates (Å×10<sup>4</sup>) and Isotropic Displacement Parameters (Å<sup>2</sup>×10<sup>3</sup>) for valinepd.

| Atom | x       | y       | z       | U(eq) |
|------|---------|---------|---------|-------|
| H1A  | 4183.25 | 6065.38 | 7119.87 | 15    |

| Atom | x       | y        | z       | U(eq) |
|------|---------|----------|---------|-------|
| H1B  | 3287.73 | 5392.7   | 6490.18 | 15    |
| H2A  | 5404.47 | 5443.73  | 5321.63 | 15    |
| H2B  | 6678.54 | 5724.3   | 5796.77 | 15    |
| H2   | 2967.7  | 5351.52  | 8169.51 | 15    |
| H3   | 933.23  | 4074.04  | 7926.21 | 17    |
| H4A  | 1798.31 | 3681.09  | 6171.41 | 27    |
| H4B  | 351.4   | 3201.22  | 6546.61 | 27    |
| H4C  | 1731.46 | 2497.13  | 6877.52 | 27    |
| H5A  | 908.73  | 6491.97  | 7603.92 | 34    |
| H5B  | -247.87 | 5672.13  | 7091.04 | 34    |
| H5C  | 1124.16 | 6130.89  | 6609.31 | 34    |
| H7   | 6186.85 | 3678.32  | 4625.06 | 16    |
| H8   | 8354.09 | 4123.73  | 4028.71 | 19    |
| H9A  | 6441.28 | 5453.18  | 3535.06 | 36    |
| H9B  | 7855.92 | 6249.07  | 3406.98 | 36    |
| H9C  | 6863.9  | 6641.23  | 4187.7  | 36    |
| H10A | 8764.76 | 6172.39  | 5327.35 | 31    |
| H10B | 9778.45 | 5921.36  | 4534.53 | 31    |
| H10C | 9611.86 | 4781.36  | 5262.64 | 31    |
| H1WA | 8252.12 | 179.06   | 5167.55 | 30    |
| H1WB | 7964.99 | -1133.94 | 5410.44 | 30    |

## Experimental

Single crystals of  $C_{10}H_{22}N_2O_5Pd$  [valinepd] were grown by allowing an acetone/water solution to evaporate slowly. A suitable crystal was selected and mounted on fiber on a Xcalibur, Sapphire3, Gemini ultra diffractometer. The crystal was kept at 100.05(10) K during data collection. Using Olex2 [1], the structure was solved with the XS [2] structure solution program using Direct Methods and refined with the SHELXL [3] refinement package using Least Squares minimisation.

1. Dolomanov, O.V., Bourhis, L.J., Gildea, R.J., Howard, J.A.K. & Puschmann, H. (2009), J. Appl. Cryst. 42, 339-341.
2. Sheldrick, G.M. (2008). Acta Cryst. A64, 112-122.
3. Sheldrick, G.M. (2015). Acta Cryst. C71, 3-8.

## Crystal structure determination of [valinepd]

**Crystal Data** for  $C_{10}H_{22}N_2O_5Pd$  ( $M = 356.69$  g/mol): orthorhombic, space group  $P2_12_12_1$  (no. 19),  $a = 9.57160(10)$  Å,  $b = 9.61940(10)$  Å,  $c = 15.22950(10)$  Å,  $V = 1402.23(2)$  Å<sup>3</sup>,  $Z = 4$ ,  $T = 100.05(10)$  K,  $\mu(Mo K\alpha) = 1.338$  mm<sup>-1</sup>,  $D_{calc} = 1.690$  g/cm<sup>3</sup>, 27728 reflections measured ( $8.474^\circ \leq 2\theta \leq 65.308^\circ$ ), 4869 unique ( $R_{int} = 0.0315$ ,  $R_{sigma} = 0.0178$ ) which were used in all calculations. The final  $R_1$  was 0.0168 ( $I > 2\sigma(I)$ ) and  $wR_2$  was 0.0397 (all data).

## Refinement model description

Number of restraints - 0, number of constraints - unknown.

Details:

1. Fixed Uiso  
At 1.2 times of:  
All C(H) groups, All N(H,H) groups  
At 1.5 times of:  
All C(H,H,H) groups, All O(H,H) groups
- 2.a Free rotating group:  
O1W(H1WA,H1WB)
- 2.b Ternary CH refined with riding coordinates:  
C2(H2), C3(H3), C7(H7), C8(H8)
- 2.c Secondary CH2 refined with riding coordinates:  
N1(H1A,H1B), N2(H2A,H2B)
- 2.d Idealised Me refined as rotating group:  
C4(H4A,H4B,H4C), C5(H5A,H5B,H5C), C9(H9A,H9B,H9C), C10(H10A,H10B,H10C)



## C.Complex (4) *cis*-bis-(isoleucinato)palladium(II)

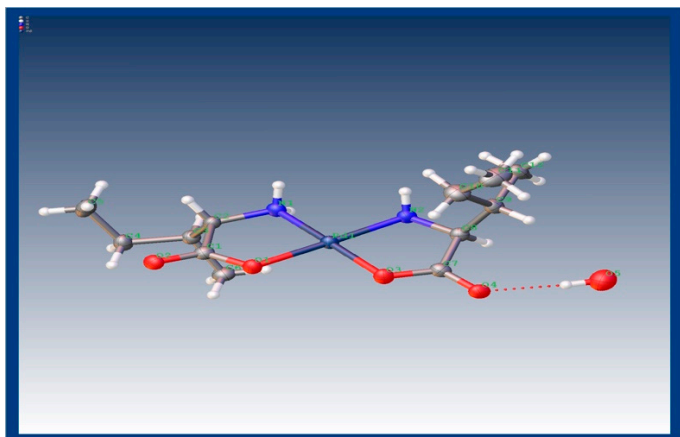

**Table S1.** Crystal data and structure refinement for Pdisoleucine.

| Identification code                         | Pdisoleucine                                                       |
|---------------------------------------------|--------------------------------------------------------------------|
| Empirical formula                           | C <sub>12</sub> H <sub>25</sub> N <sub>2</sub> O <sub>4.5</sub> Pd |
| Formula weight                              | 375.74                                                             |
| Temperature/K                               | 293(2)                                                             |
| Crystal system                              | orthorhombic                                                       |
| Space group                                 | P2 <sub>1</sub> 2 <sub>1</sub> 2 <sub>1</sub>                      |
| a/Å                                         | 7.5553(2)                                                          |
| b/Å                                         | 9.3947(3)                                                          |
| c/Å                                         | 21.0623(5)                                                         |
| α/°                                         | 90                                                                 |
| β/°                                         | 90                                                                 |
| γ/°                                         | 90                                                                 |
| Volume/Å <sup>3</sup>                       | 1495.00(7)                                                         |
| Z                                           | 4                                                                  |
| ρ <sub>calc</sub> /cm <sup>3</sup>          | 1.669                                                              |
| μ/mm <sup>-1</sup>                          | 1.257                                                              |
| F(000)                                      | 772.0                                                              |
| Crystal size/mm <sup>3</sup>                | 0.374 × 0.291 × 0.205                                              |
| Radiation                                   | MoKα (λ = 0.71073)                                                 |
| 2θ range for data collection/°              | 8.678 to 64.178                                                    |
| Index ranges                                | -11 ≤ h ≤ 11, -13 ≤ k ≤ 13, -29 ≤ l ≤ 30                           |
| Reflections collected                       | 32181                                                              |
| Independent reflections                     | 4891 [R <sub>int</sub> = 0.0327, R <sub>sigma</sub> = 0.0217]      |
| Data/restraints/parameters                  | 4891/0/188                                                         |
| Goodness-of-fit on F <sup>2</sup>           | 1.095                                                              |
| Final R indexes [I ≥ 2σ (I)]                | R <sub>1</sub> = 0.0321, wR <sub>2</sub> = 0.0795                  |
| Final R indexes [all data]                  | R <sub>1</sub> = 0.0356, wR <sub>2</sub> = 0.0821                  |
| Largest diff. peak/hole / e Å <sup>-3</sup> | 1.80/-1.47                                                         |
| Flack parameter                             | -0.044(10)                                                         |

**Table S2.** Fractional Atomic Coordinates (×10<sup>4</sup>) and Equivalent Isotropic Displacement Parameters (Å<sup>2</sup>×10<sup>3</sup>) for Pdisoleucine. U<sub>eq</sub> is defined as 1/3 of the trace of the orthogonalised U<sub>ij</sub> tensor.

| Atom | x          | y          | z           | U(eq)     |
|------|------------|------------|-------------|-----------|
| Pd1  | 2227.0 (3) | 8161.0 (2) | 7512.6 (2)  | 19.50 (8) |
| O1   | 3499 (4)   | 9604 (3)   | 6986.9 (13) | 24.3 (5)  |
| O2   | 6013 (4)   | 10025 (3)  | 6480.6 (13) | 25.7 (5)  |

| Atom | x          | y        | z           | U(eq)     |
|------|------------|----------|-------------|-----------|
| O3   | 58 (3)     | 9346 (2) | 7686.5 (13) | 25.3 (6)  |
| O4   | -2646 (4)  | 9245 (3) | 8093.4 (12) | 26.7 (5)  |
| N1   | 4327 (4)   | 6938 (3) | 7307.9 (14) | 23.0 (5)  |
| N2   | 985 (4)    | 6737 (3) | 8066.8 (14) | 22.2 (5)  |
| C1   | 5013 (4)   | 9215 (3) | 6756.5 (17) | 21.5 (6)  |
| C2   | 5562 (5)   | 7650 (4) | 6851.3 (16) | 21.2 (6)  |
| C3   | 5658 (5)   | 6813 (4) | 6228.4 (16) | 22.0 (6)  |
| C4   | 7174 (5)   | 7291 (4) | 5799.1 (18) | 27.9 (7)  |
| C5   | 8982 (6)   | 7389 (5) | 6115 (2)    | 34.8 (9)  |
| C6   | 3903 (5)   | 6825 (4) | 5870.0 (18) | 28.5 (7)  |
| C7   | -1171 (5)  | 8722 (4) | 8009.8 (17) | 23.0 (6)  |
| C8   | -743 (5)   | 7283 (4) | 8307.0 (16) | 21.5 (6)  |
| C9   | -829 (6)   | 7381 (4) | 9035.0 (17) | 25.6 (8)  |
| C10  | 446 (7)    | 8495 (5) | 9305 (2)    | 36.9 (9)  |
| C11  | -50 (7)    | 8960 (7) | 9968 (2)    | 49.4 (13) |
| C12  | -553 (6)   | 5917 (4) | 9338.5 (19) | 32.4 (8)  |
| O5   | -5383 (11) | 7978 (9) | 8784 (4)    | 50.1 (17) |

**Table S3.** Anisotropic Displacement Parameters ( $\text{\AA}^2 \times 10^3$ ) for Pdisoleucine. The Anisotropic displacement factor exponent takes the form:  $-2\pi^2[h^2a^{*2}U_{11}+2hka^*b^*U_{12}+\dots]$ .

| Atom | U <sub>11</sub> | U <sub>22</sub> | U <sub>33</sub> | U <sub>23</sub> | U <sub>13</sub> | U <sub>12</sub> |
|------|-----------------|-----------------|-----------------|-----------------|-----------------|-----------------|
| Pd1  | 21.65 (12)      | 14.06 (11)      | 22.79 (12)      | -0.52 (11)      | 2.01 (11)       | 0.40 (6)        |
| O1   | 23.6 (12)       | 17.6 (11)       | 31.7 (13)       | 3.1 (9)         | 4.1 (10)        | 0.6 (9)         |
| O2   | 26.2 (13)       | 20.2 (11)       | 30.7 (13)       | 2.8 (9)         | 0.8 (10)        | -3.7 (10)       |
| O3   | 26.3 (13)       | 17.0 (11)       | 32.6 (14)       | 0.9 (9)         | 5.7 (9)         | 3.4 (10)        |
| O4   | 27.1 (13)       | 23.4 (12)       | 29.7 (12)       | 1.8 (10)        | 3.4 (10)        | 5.3 (10)        |
| N1   | 25.1 (14)       | 17.7 (12)       | 26.1 (13)       | 1.0 (10)        | 2.1 (10)        | -0.1 (11)       |
| N2   | 23.9 (14)       | 18.7 (13)       | 24.0 (13)       | -0.2 (11)       | 2.5 (11)        | 2.9 (11)        |
| C1   | 23.0 (16)       | 18.6 (15)       | 22.8 (16)       | -3.3 (11)       | -1.7 (11)       | -0.9 (12)       |
| C2   | 18.9 (14)       | 19.6 (14)       | 25.2 (16)       | 1.1 (12)        | 0.9 (12)        | 0.3 (12)        |
| C3   | 22.6 (15)       | 19.6 (14)       | 23.8 (15)       | -1.7 (12)       | 0.9 (12)        | -2.1 (12)       |
| C4   | 27.3 (17)       | 25.1 (17)       | 31.4 (17)       | 0.6 (13)        | 7.6 (14)        | 1.1 (14)        |
| C5   | 23.3 (18)       | 27.5 (19)       | 54 (3)          | 1.7 (18)        | 7.4 (18)        | 2.4 (16)        |
| C6   | 27.9 (17)       | 29.9 (18)       | 27.6 (16)       | -3.2 (14)       | -4.5 (13)       | -1.3 (15)       |
| C7   | 29.1 (17)       | 17.3 (14)       | 22.5 (16)       | -2.0 (12)       | 0.5 (13)        | 0.2 (12)        |
| C8   | 23.6 (15)       | 17.0 (14)       | 24.0 (15)       | -1.8 (11)       | 1.6 (12)        | -0.4 (12)       |
| C9   | 29.0 (19)       | 24.3 (17)       | 23.4 (16)       | -1.2 (13)       | 5.1 (14)        | 2.2 (15)        |
| C10  | 44 (2)          | 36 (2)          | 29.9 (19)       | -6.1 (16)       | -3.8 (18)       | -4.6 (18)       |
| C11  | 45 (3)          | 62 (3)          | 42 (3)          | -25 (2)         | -6.8 (19)       | 9 (2)           |
| C12  | 38 (2)          | 29.2 (19)       | 30.1 (18)       | 8.3 (15)        | 5.6 (16)        | 3.2 (16)        |
| O5   | 42 (4)          | 53 (4)          | 55 (4)          | -2 (3)          | 5 (3)           | -1 (3)          |

**Table S4.** Bond Lengths for Pdisoleucine.

| Atom | Atom | Length/ $\text{\AA}$ | Atom | Atom | Length/ $\text{\AA}$ |
|------|------|----------------------|------|------|----------------------|
| Pd1  | O1   | 1.997 (3)            | C1   | C2   | 1.540 (5)            |
| Pd1  | O3   | 2.014 (2)            | C2   | C3   | 1.531 (5)            |
| Pd1  | N1   | 2.006 (3)            | C3   | C4   | 1.527 (5)            |
| Pd1  | N2   | 2.008 (3)            | C3   | C6   | 1.526 (5)            |
| O1   | C1   | 1.295 (4)            | C4   | C5   | 1.521 (6)            |
| O2   | C1   | 1.220 (4)            | C7   | C8   | 1.525 (5)            |
| O3   | C7   | 1.292 (4)            | C8   | C9   | 1.538 (5)            |
| O4   | C7   | 1.231 (5)            | C9   | C10  | 1.532 (6)            |
| N1   | C2   | 1.498 (5)            | C9   | C12  | 1.532 (5)            |
| N2   | C8   | 1.492 (5)            | C10  | C11  | 1.511 (6)            |

**Table S5.** Bond Angles for Pdisoleucine.

| Atom | Atom | Atom | Angle/°     | Atom | Atom | Atom | Angle/°   |
|------|------|------|-------------|------|------|------|-----------|
| O1   | Pd1  | O3   | 96.74 (10)  | C3   | C2   | C1   | 113.1 (3) |
| O1   | Pd1  | N1   | 83.61 (11)  | C4   | C3   | C2   | 113.1 (3) |
| O1   | Pd1  | N2   | 178.13 (12) | C6   | C3   | C2   | 112.3 (3) |
| N1   | Pd1  | O3   | 177.43 (12) | C6   | C3   | C4   | 110.9 (3) |
| N1   | Pd1  | N2   | 96.49 (12)  | C5   | C4   | C3   | 115.6 (3) |
| N2   | Pd1  | O3   | 83.24 (11)  | O3   | C7   | C8   | 117.8 (3) |
| C1   | O1   | Pd1  | 116.2 (2)   | O4   | C7   | O3   | 123.0 (3) |
| C7   | O3   | Pd1  | 115.5 (2)   | O4   | C7   | C8   | 119.2 (3) |
| C2   | N1   | Pd1  | 112.0 (2)   | N2   | C8   | C7   | 110.6 (3) |
| C8   | N2   | Pd1  | 112.1 (2)   | N2   | C8   | C9   | 113.3 (3) |
| O1   | C1   | C2   | 117.3 (3)   | C7   | C8   | C9   | 110.3 (3) |
| O2   | C1   | O1   | 123.3 (3)   | C10  | C9   | C8   | 112.6 (3) |
| O2   | C1   | C2   | 119.4 (3)   | C12  | C9   | C8   | 110.9 (3) |
| N1   | C2   | C1   | 110.0 (3)   | C12  | C9   | C10  | 111.9 (4) |
| N1   | C2   | C3   | 110.5 (3)   | C11  | C10  | C9   | 112.6 (4) |

Table S6. Hydrogen Bonds for Pdisoleucine.

| D  | H   | A               | d(D-H)/Å | d(H-A)/Å | d(D-A)/Å  | D-H-A/° |
|----|-----|-----------------|----------|----------|-----------|---------|
| N1 | H1B | O4 <sup>1</sup> | 0.89     | 2.08     | 2.954 (4) | 167.1   |
| N2 | H2A | O3 <sup>1</sup> | 0.89     | 1.98     | 2.861 (4) | 168.8   |
| N2 | H2B | O2 <sup>2</sup> | 0.89     | 2.26     | 2.939 (4) | 133.3   |
| O5 | H5D | O4              | 0.85     | 1.95     | 2.795 (8) | 170.4   |
| O5 | H5E | O2 <sup>1</sup> | 0.85     | 2.08     | 2.869 (8) | 155.1   |

$$^1\text{-X}, -1/2+Y, 3/2\text{-Z}; ^2\text{-X}, -1/2+Y, 3/2\text{-Z}.$$

Table S7. Torsion Angles for Pdisoleucine.

| A   | B  | C  | D  | Angle/°    | A   | B  | C   | D   | Angle/°    |
|-----|----|----|----|------------|-----|----|-----|-----|------------|
| Pd1 | O1 | C1 | O2 | -172.6 (3) | O4  | C7 | C8  | N2  | 171.0 (3)  |
| Pd1 | O1 | C1 | C2 | 6.4 (4)    | O4  | C7 | C8  | C9  | -62.8 (4)  |
| Pd1 | O3 | C7 | O4 | -171.7 (3) | N1  | C2 | C3  | C4  | -167.7 (3) |
| Pd1 | O3 | C7 | C8 | 9.3 (4)    | N1  | C2 | C3  | C6  | 66.0 (4)   |
| Pd1 | N1 | C2 | C1 | 9.3 (3)    | N2  | C8 | C9  | C10 | 66.2 (4)   |
| Pd1 | N1 | C2 | C3 | -116.3 (3) | N2  | C8 | C9  | C12 | -60.1 (4)  |
| Pd1 | N2 | C8 | C7 | 5.6 (3)    | C1  | C2 | C3  | C4  | 68.6 (4)   |
| Pd1 | N2 | C8 | C9 | -118.8 (3) | C1  | C2 | C3  | C6  | -57.8 (4)  |
| O1  | C1 | C2 | N1 | -10.4 (4)  | C2  | C3 | C4  | C5  | 50.1 (4)   |
| O1  | C1 | C2 | C3 | 113.6 (3)  | C6  | C3 | C4  | C5  | 177.2 (3)  |
| O2  | C1 | C2 | N1 | 168.6 (3)  | C7  | C8 | C9  | C10 | -58.4 (4)  |
| O2  | C1 | C2 | C3 | -67.3 (4)  | C7  | C8 | C9  | C12 | 175.3 (3)  |
| O3  | C7 | C8 | N2 | -9.9 (4)   | C8  | C9 | C10 | C11 | 160.3 (4)  |
| O3  | C7 | C8 | C9 | 116.2 (4)  | C12 | C9 | C10 | C11 | -74.0 (5)  |

Table S8. Hydrogen Atom Coordinates (Å×10<sup>4</sup>) and Isotropic Displacement Parameters (Å<sup>2</sup>×10<sup>3</sup>) for Pdisoleucine.

| Atom | x       | y       | z       | U(eq) |
|------|---------|---------|---------|-------|
| H1A  | 4907.73 | 6739.09 | 7664.62 | 28    |
| H1B  | 3954.69 | 6120.93 | 7141.2  | 28    |
| H2A  | 800.76  | 5942.21 | 7846.36 | 27    |
| H2B  | 1676.57 | 6521.8  | 8395.23 | 27    |
| H2   | 6746.14 | 7644.23 | 7041.32 | 25    |
| H3   | 5895.93 | 5819.7  | 6342.43 | 26    |
| H4A  | 7257.9  | 6632.08 | 5445.85 | 34    |
| H4B  | 6880.91 | 8218.27 | 5626.1  | 34    |
| H5A  | 9881.05 | 7468.44 | 5794.82 | 52    |
| H5B  | 9186.1  | 6548.1  | 6363.43 | 52    |
| H5C  | 9017.85 | 8210.57 | 6385.18 | 52    |
| H6A  | 2977.42 | 6489.7  | 6144.08 | 43    |
| H6B  | 3987.72 | 6214.65 | 5505.65 | 43    |

| Atom | x        | y       | z        | U(eq) |
|------|----------|---------|----------|-------|
| H6C  | 3640.5   | 7777.49 | 5734.85  | 43    |
| H8   | -1662.18 | 6612.56 | 8171.17  | 26    |
| H9   | -2029.19 | 7689.57 | 9145.13  | 31    |
| H10A | 1633.58  | 8102.13 | 9311.24  | 44    |
| H10B | 455      | 9319.96 | 9027.99  | 44    |
| H11A | -1227.35 | 9343.44 | 9965.65  | 74    |
| H11B | 765.24   | 9675.39 | 10111.15 | 74    |
| H11C | -2.08    | 8156.18 | 10249.13 | 74    |
| H12A | -1333.47 | 5239.33 | 9143.45  | 49    |
| H12B | -803.7   | 5971.68 | 9784.67  | 49    |
| H12C | 651.52   | 5620.86 | 9277.71  | 49    |
| H5D  | -4602.4  | 8456.44 | 8586.92  | 75    |
| H5E  | -5346.66 | 7158.25 | 8613.83  | 75    |

Table S9. Atomic Occupancy for Pdisoleucine.

| Atom | Occupancy | Atom | Occupancy | Atom | Occupancy |
|------|-----------|------|-----------|------|-----------|
| O5   | 0.5       | H5D  | 0.5       | H5E  | 0.5       |

## Experimental

Single crystals of  $C_{12}H_{25}N_2O_{4.5}Pd$  [Pdisoleucine] were grown by allowing an acetone/water solution to evaporate slowly. A suitable crystal was selected and mounted on a fiber on a Xcalibur, Sapphire3, Gemini ultra diffractometer. The crystal was kept at 293(2) K during data collection. Using Olex2 [1], the structure was solved with the SHELXT [2] structure solution program using Intrinsic Phasing and refined with the SHELXL [3] refinement package using CGLS minimisation.

1. Dolomanov, O.V., Bourhis, L.J., Gildea, R.J., Howard, J.A.K. & Puschmann, H. (2009), J. Appl. Cryst. 42, 339-341.
2. Sheldrick, G.M. (2015). Acta Cryst. A71, 3-8.
3. Sheldrick, G.M. (2015). Acta Cryst. C71, 3-8.

## Crystal structure determination of [Pdisoleucine]

**Crystal Data** for  $C_{12}H_{25}N_2O_{4.5}Pd$  ( $M = 375.74$  g/mol): orthorhombic, space group  $P2_12_12_1$  (no. 19),  $a = 7.5553(2)$  Å,  $b = 9.3947(3)$  Å,  $c = 21.0623(5)$  Å,  $V = 1495.00(7)$  Å<sup>3</sup>,  $Z = 4$ ,  $T = 293(2)$  K,  $\mu(\text{MoK}\alpha) = 1.257$  mm<sup>-1</sup>,  $D_{\text{calc}} = 1.669$  g/cm<sup>3</sup>, 32181 reflections measured ( $8.678^\circ \leq 2\theta \leq 64.178^\circ$ ), 4891 unique ( $R_{\text{int}} = 0.0327$ ,  $R_{\text{sigma}} = 0.0217$ ) which were used in all calculations. The final  $R_1$  was 0.0321 ( $I > 2\sigma(I)$ ) and  $wR_2$  was 0.0821 (all data).

## Refinement model description

Number of restraints - 0, number of constraints - unknown.

Details:

1. Fixed Uiso  
At 1.2 times of:  
All C(H) groups, All C(H,H) groups, All N(H,H) groups  
At 1.5 times of:  
All C(H,H,H) groups, All O(H,H) groups
2. Others  
Fixed Sof: O5(0.5) H5D(0.5) H5E(0.5)
- 3.a Free rotating group:  
O5(H5D,H5E)
- 3.b Ternary CH refined with riding coordinates:  
C2(H2), C3(H3), C8(H8), C9(H9)
- 3.c Secondary CH2 refined with riding coordinates:  
N1(H1A,H1B), N2(H2A,H2B), C4(H4A,H4B), C10(H10A,H10B)
- 3.d Idealised Me refined as rotating group:  
C5(H5A,H5B,H5C), C6(H6A,H6B,H6C), C11(H11A,H11B,H11C), C12(H12A,H12B,H12C)

## D.Complex (15) cis-bis-(serinato)palladium(II)

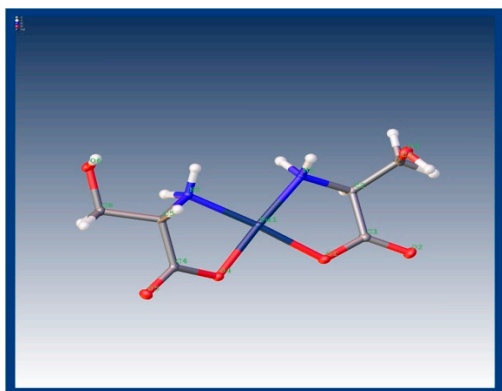

Table S1. Crystal data and structure refinement for Pdserine.

| Identification code                         | Pdserine                                                        |
|---------------------------------------------|-----------------------------------------------------------------|
| Empirical formula                           | C <sub>6</sub> H <sub>12</sub> N <sub>2</sub> O <sub>6</sub> Pd |
| Formula weight                              | 314.58                                                          |
| Temperature/K                               | 100.05(10)                                                      |
| Crystal system                              | orthorhombic                                                    |
| Space group                                 | P2 <sub>1</sub> 2 <sub>1</sub> 2 <sub>1</sub>                   |
| a/Å                                         | 8.71610(10)                                                     |
| b/Å                                         | 9.67670(10)                                                     |
| c/Å                                         | 11.2446(2)                                                      |
| α/°                                         | 90                                                              |
| β/°                                         | 90                                                              |
| γ/°                                         | 90                                                              |
| Volume/Å <sup>3</sup>                       | 948.40(2)                                                       |
| Z                                           | 4                                                               |
| ρ <sub>calc</sub> /g/cm <sup>3</sup>        | 2.203                                                           |
| μ/mm <sup>-1</sup>                          | 1.970                                                           |
| F(000)                                      | 624.0                                                           |
| Crystal size/mm <sup>3</sup>                | 0.411 × 0.253 × 0.189                                           |
| Radiation                                   | Mo Kα (λ = 0.71073)                                             |
| 2θ range for data collection/°              | 7.248 to 65.028                                                 |
| Index ranges                                | -12 ≤ h ≤ 12, -14 ≤ k ≤ 14, -16 ≤ l ≤ 16                        |
| Reflections collected                       | 20421                                                           |
| Independent reflections                     | 3260 [R <sub>int</sub> = 0.0329, R <sub>sigma</sub> = 0.0200]   |
| Data/restraints/parameters                  | 3260/0/143                                                      |
| Goodness-of-fit on F <sup>2</sup>           | 1.091                                                           |
| Final R indexes [I ≥ 2σ(I)]                 | R <sub>1</sub> = 0.0148, wR <sub>2</sub> = 0.0346               |
| Final R indexes [all data]                  | R <sub>1</sub> = 0.0156, wR <sub>2</sub> = 0.0350               |
| Largest diff. peak/hole / e Å <sup>-3</sup> | 0.55/-0.50                                                      |
| Flack parameter                             | -0.047(11)                                                      |

Table S2. Fractional Atomic Coordinates (×10<sup>4</sup>) and Equivalent Isotropic Displacement Parameters (Å<sup>2</sup>×10<sup>3</sup>) for Pdserine. U<sub>eq</sub> is defined as 1/3 of the trace of the orthogonalised U<sub>ij</sub> tensor.

| Atom | x           | y           | z           | U(eq)    |
|------|-------------|-------------|-------------|----------|
| Pd1  | 3878.8 (2)  | 5821.0 (2)  | 5482.8 (2)  | 6.98 (5) |
| O1   | 3187.1 (19) | 4721.6 (16) | 6888.2 (14) | 11.2 (3) |
| O2   | 3496.6 (19) | 2713.3 (16) | 7810.0 (15) | 14.5 (3) |
| O3   | 7053.8 (18) | 2623.4 (18) | 6432.1 (15) | 13.1 (3) |
| O4   | 2889.4 (17) | 7588.0 (17) | 6047.3 (13) | 9.5 (3)  |
| O5   | 2820.3 (19) | 9851.0 (16) | 5705.5 (14) | 12.4 (3) |
| O6   | 5321.1 (17) | 9232 (2)    | 2512.5 (13) | 12.7 (3) |

| Atom | x        | y           | z           | U(eq)    |
|------|----------|-------------|-------------|----------|
| N1   | 4898 (2) | 4038.1 (19) | 5012.2 (16) | 9.5 (3)  |
| N2   | 4440 (2) | 7014.1 (19) | 4077.5 (17) | 9.0 (3)  |
| C1   | 3679 (2) | 3448 (2)    | 6934.6 (19) | 9.2 (4)  |
| C2   | 4409 (3) | 2889 (2)    | 5800.5 (19) | 8.7 (4)  |
| C3   | 5732 (2) | 1897 (2)    | 6038 (2)    | 11.0 (4) |
| C4   | 3307 (2) | 8697 (2)    | 5462 (2)    | 8.4 (3)  |
| C5   | 4482 (2) | 8481.1 (19) | 4475 (2)    | 8.3 (3)  |
| C6   | 4245 (2) | 9486 (2)    | 3443.5 (19) | 10.4 (4) |

**Table S3.** Anisotropic Displacement Parameters ( $\text{\AA}^2 \times 10^3$ ) for Pdserine. The Anisotropic displacement factor exponent takes the form:  $-2\pi^2[h^2a^{*2}U_{11}+2hka^*b^*U_{12}+\dots]$ .

| Atom | U <sub>11</sub> | U <sub>22</sub> | U <sub>33</sub> | U <sub>23</sub> | U <sub>13</sub> | U <sub>12</sub> |
|------|-----------------|-----------------|-----------------|-----------------|-----------------|-----------------|
| Pd1  | 7.89 (6)        | 6.69 (6)        | 6.35 (6)        | 0.28 (5)        | 0.61 (5)        | 0.55 (5)        |
| O1   | 12.9 (7)        | 9.9 (7)         | 10.7 (7)        | 1.0 (6)         | 3.6 (6)         | 1.0 (6)         |
| O2   | 17.1 (8)        | 13.6 (8)        | 12.8 (7)        | 4.3 (6)         | 4.8 (6)         | 0.4 (6)         |
| O3   | 10.7 (6)        | 18.9 (8)        | 9.7 (7)         | 1.5 (6)         | -1.4 (6)        | -1.6 (6)        |
| O4   | 10.0 (6)        | 9.0 (7)         | 9.5 (7)         | 0.2 (6)         | 1.8 (5)         | 0.2 (6)         |
| O5   | 14.2 (7)        | 8.8 (7)         | 14.3 (8)        | -0.1 (5)        | 1.8 (6)         | 2.5 (6)         |
| O6   | 11.2 (7)        | 18.6 (7)        | 8.2 (6)         | 1.1 (7)         | 1.0 (5)         | -1.3 (7)        |
| N1   | 11.9 (7)        | 9.2 (8)         | 7.5 (7)         | 0.6 (7)         | 1.5 (6)         | 1.3 (7)         |
| N2   | 10.7 (7)        | 8.4 (7)         | 8.0 (8)         | 0.3 (6)         | 0.6 (6)         | 1.2 (6)         |
| C1   | 7.5 (9)         | 9.4 (8)         | 10.8 (9)        | 0.0 (7)         | 0.8 (7)         | -1.3 (7)        |
| C2   | 9.6 (8)         | 7.8 (8)         | 8.7 (9)         | 0.8 (6)         | -0.3 (7)        | -1.1 (7)        |
| C3   | 12.4 (9)        | 9.7 (9)         | 10.8 (9)        | 0.3 (7)         | -0.9 (7)        | 1.1 (7)         |
| C4   | 7.0 (7)         | 10.2 (8)        | 8.0 (8)         | 1.3 (8)         | -1.8 (8)        | -0.9 (6)        |
| C5   | 9.0 (8)         | 8.1 (8)         | 7.7 (8)         | 0.2 (7)         | 0.3 (8)         | 0.2 (6)         |
| C6   | 11.4 (9)        | 10.5 (9)        | 9.2 (9)         | 1.9 (7)         | 1.0 (7)         | 0.9 (6)         |

**Table S4** Bond Lengths for Pdserine.

| Atom | Atom | Length/ $\text{\AA}$ | Atom | Atom | Length/ $\text{\AA}$ |
|------|------|----------------------|------|------|----------------------|
| Pd1  | O1   | 1.9981 (16)          | O5   | C4   | 1.226 (2)            |
| Pd1  | O4   | 2.0175 (16)          | O6   | C6   | 1.427 (2)            |
| Pd1  | N1   | 2.0114 (18)          | N1   | C2   | 1.485 (3)            |
| Pd1  | N2   | 2.0173 (19)          | N2   | C5   | 1.489 (3)            |
| O1   | C1   | 1.306 (2)            | C1   | C2   | 1.525 (3)            |
| O2   | C1   | 1.225 (3)            | C2   | C3   | 1.524 (3)            |
| O3   | C3   | 1.421 (3)            | C4   | C5   | 1.524 (3)            |
| O4   | C4   | 1.310 (3)            | C5   | C6   | 1.528 (3)            |

**Table S5** Bond Angles for Pdserine.

| Atom | Atom | Atom | Angle/ $^\circ$ | Atom | Atom | Atom | Angle/ $^\circ$ |
|------|------|------|-----------------|------|------|------|-----------------|
| O1   | Pd1  | O4   | 94.21 (6)       | O2   | C1   | C2   | 121.36 (18)     |
| O1   | Pd1  | N1   | 83.38 (7)       | N1   | C2   | C1   | 110.68 (17)     |
| O1   | Pd1  | N2   | 175.89 (7)      | N1   | C2   | C3   | 111.05 (17)     |
| N1   | Pd1  | O4   | 176.88 (7)      | C3   | C2   | C1   | 113.13 (17)     |
| N1   | Pd1  | N2   | 100.23 (7)      | O3   | C3   | C2   | 110.92 (17)     |
| N2   | Pd1  | O4   | 82.25 (6)       | O4   | C4   | C5   | 116.15 (17)     |
| C1   | O1   | Pd1  | 115.79 (14)     | O5   | C4   | O4   | 122.5 (2)       |
| C4   | O4   | Pd1  | 114.63 (13)     | O5   | C4   | C5   | 121.33 (18)     |
| C2   | N1   | Pd1  | 111.02 (13)     | N2   | C5   | C4   | 109.41 (16)     |
| C5   | N2   | Pd1  | 108.47 (13)     | N2   | C5   | C6   | 112.11 (18)     |
| O1   | C1   | C2   | 116.02 (18)     | C4   | C5   | C6   | 112.00 (16)     |
| O2   | C1   | O1   | 122.5 (2)       | O6   | C6   | C5   | 110.99 (16)     |

**Table S6** Hydrogen Bonds for Pdserine.

| D  | H   | A               | d(D-H)/Å | d(H-A)/Å | d(D-A)/Å  | D-H-A/° |
|----|-----|-----------------|----------|----------|-----------|---------|
| O3 | H3  | O4 <sup>1</sup> | 0.83 (3) | 2.01 (3) | 2.835 (2) | 178 (3) |
| O6 | H6  | O1 <sup>2</sup> | 0.81 (3) | 1.96 (3) | 2.778 (2) | 176 (3) |
| N1 | H1A | O6 <sup>3</sup> | 0.91     | 2.02     | 2.852 (2) | 152.1   |
| N1 | H1B | O5 <sup>2</sup> | 0.91     | 2.10     | 2.880 (2) | 143.8   |

<sup>1</sup>1-X,-1/2+Y,3/2-Z; <sup>2</sup>1/2+X,3/2-Y,1-Z; <sup>3</sup>1-X,-1/2+Y,1/2-Z.

Table S7. Torsion Angles for Pdserine.

| A   | B  | C  | D  | Angle/°      | A  | B  | C  | D  | Angle/°      |
|-----|----|----|----|--------------|----|----|----|----|--------------|
| Pd1 | O1 | C1 | O2 | 171.09 (17)  | O2 | C1 | C2 | N1 | -164.06 (19) |
| Pd1 | O1 | C1 | C2 | -12.7 (2)    | O2 | C1 | C2 | C3 | -38.7 (3)    |
| Pd1 | O4 | C4 | O5 | -179.23 (17) | O4 | C4 | C5 | N2 | 22.3 (2)     |
| Pd1 | O4 | C4 | C5 | -1.1 (2)     | O4 | C4 | C5 | C6 | 147.27 (18)  |
| Pd1 | N1 | C2 | C1 | -16.9 (2)    | O5 | C4 | C5 | N2 | -159.5 (2)   |
| Pd1 | N1 | C2 | C3 | -143.40 (14) | O5 | C4 | C5 | C6 | -34.6 (3)    |
| Pd1 | N2 | C5 | C4 | -31.80 (19)  | N1 | C2 | C3 | O3 | 51.3 (2)     |
| Pd1 | N2 | C5 | C6 | -156.68 (13) | N2 | C5 | C6 | O6 | -54.4 (2)    |
| O1  | C1 | C2 | N1 | 19.7 (2)     | C1 | C2 | C3 | O3 | -73.9 (2)    |
| O1  | C1 | C2 | C3 | 145.05 (19)  | C4 | C5 | C6 | O6 | -177.87 (17) |

Table S8. Hydrogen Atom Coordinates (Å×10<sup>4</sup>) and Isotropic Displacement Parameters (Å<sup>2</sup>×10<sup>3</sup>) for Pdserine.

| Atom | x         | y         | z         | U(eq) |
|------|-----------|-----------|-----------|-------|
| H3   | 7040 (40) | 2610 (30) | 7170 (30) | 20    |
| H6   | 6150 (40) | 9530 (30) | 2720 (30) | 19    |
| H1A  | 4650.93   | 3831.82   | 4246.2    | 11    |
| H1B  | 5934.52   | 4138.53   | 5055.97   | 11    |
| H2A  | 5374.42   | 6760.57   | 3789.1    | 11    |
| H2B  | 3734.47   | 6908.48   | 3488.26   | 11    |
| H2   | 3599.33   | 2357.69   | 5366.42   | 10    |
| H3A  | 5421.05   | 1218.09   | 6651.1    | 13    |
| H3B  | 5978.3    | 1384.16   | 5300.72   | 13    |
| H5   | 5521.81   | 8661.33   | 4817.44   | 10    |
| H6A  | 3189.49   | 9385.35   | 3130.38   | 12    |
| H6B  | 4367.01   | 10446.12  | 3733.62   | 12    |

## Experimental

Single crystals of C<sub>6</sub>H<sub>12</sub>N<sub>2</sub>O<sub>6</sub>Pd [**Pdserine**] were grown by allowing an acetone/water solution to evaporate slowly. A suitable crystal was selected and mounted on fiber on a Xcalibur, Sapphire3, Gemini ultra diffractometer. The crystal was kept at 100.05(10) K during data collection. Using Olex2 [1], the structure was solved with the SHELXT [2] structure solution program using Intrinsic Phasing and refined with the SHELXL [3] refinement package using Least Squares minimisation.

1. Dolomanov, O.V., Bourhis, L.J., Gildea, R.J., Howard, J.A.K. & Puschmann, H. (2009), J. Appl. Cryst. 42, 339-341.
2. Sheldrick, G.M. (2015). Acta Cryst. A71, 3-8.
3. Sheldrick, G.M. (2015). Acta Cryst. C71, 3-8.

## Crystal structure determination of [**Pdserine**]

**Crystal Data** for C<sub>6</sub>H<sub>12</sub>N<sub>2</sub>O<sub>6</sub>Pd (*M* = 314.58 g/mol): orthorhombic, space group P2<sub>1</sub>2<sub>1</sub>2<sub>1</sub> (no. 19), *a* = 8.71610(10) Å, *b* = 9.67670(10) Å, *c* = 11.2446(2) Å, *V* = 948.40(2) Å<sup>3</sup>, *Z* = 4, *T* = 100.05(10) K, μ(Mo Kα) = 1.970 mm<sup>-1</sup>, *D*<sub>calc</sub> = 2.203 g/cm<sup>3</sup>, 20421 reflections measured (7.248° ≤ 2θ ≤ 65.028°), 3260 unique (*R*<sub>int</sub> = 0.0329, *R*<sub>sigma</sub> = 0.0200) which were used in all calculations. The final *R*<sub>1</sub> was 0.0148 (*I* > 2σ(*I*)) and *wR*<sub>2</sub> was 0.0350 (all data).

## Refinement model description

Number of restraints - 0, number of constraints - unknown.

Details:

1. Fixed Uiso

At 1.2 times of:

All C(H) groups, All C(H,H) groups, All N(H,H) groups

At 1.5 times of:

All O(H) groups

2.a Ternary CH refined with riding coordinates:

C2 (H2), C5 (H5)

2.b Secondary CH2 refined with riding coordinates:

N1 (H1A,H1B), N2 (H2A,H2B), C3 (H3A,H3B), C6 (H6A,H6B)

## E. Complex (16) *cis*-bis(threoninato)palladium(II)

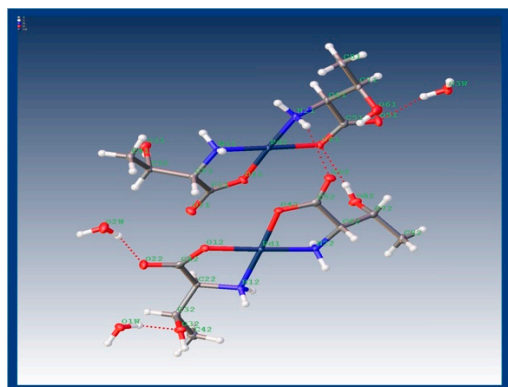

**Table S1.** Crystal data and structure refinement for threoninePd.

| Identification code                         | threoninePd                                                                    |
|---------------------------------------------|--------------------------------------------------------------------------------|
| Empirical formula                           | C <sub>16</sub> H <sub>38</sub> N <sub>4</sub> O <sub>15</sub> Pd <sub>2</sub> |
| Formula weight                              | 739.30                                                                         |
| Temperature/K                               | 100.00(10)                                                                     |
| Crystal system                              | orthorhombic                                                                   |
| Space group                                 | P2 <sub>1</sub> 2 <sub>1</sub> 2 <sub>1</sub>                                  |
| a/Å                                         | 10.6869(2)                                                                     |
| b/Å                                         | 11.3234(3)                                                                     |
| c/Å                                         | 21.0572(3)                                                                     |
| α/°                                         | 90                                                                             |
| β/°                                         | 90                                                                             |
| γ/°                                         | 90                                                                             |
| Volume/Å <sup>3</sup>                       | 2548.17(9)                                                                     |
| Z                                           | 4                                                                              |
| ρ <sub>calc</sub> /g/cm <sup>3</sup>        | 1.927                                                                          |
| μ/mm <sup>-1</sup>                          | 1.490                                                                          |
| F(000)                                      | 1496.0                                                                         |
| Crystal size/mm <sup>3</sup>                | 0.418 × 0.264 × 0.259                                                          |
| Radiation                                   | Mo Kα (λ = 0.71073)                                                            |
| 2θ range for data collection/°              | 6.516 to 65.618                                                                |
| Index ranges                                | -15 ≤ h ≤ 15, -13 ≤ k ≤ 16, -30 ≤ l ≤ 31                                       |
| Reflections collected                       | 22934                                                                          |
| Independent reflections                     | 8597 [R <sub>int</sub> = 0.0555, R <sub>sigma</sub> = 0.0814]                  |
| Data/restraints/parameters                  | 8597/0/351                                                                     |
| Goodness-of-fit on F <sup>2</sup>           | 1.003                                                                          |
| Final R indexes [I ≥ 2σ (I)]                | R <sub>1</sub> = 0.0404, wR <sub>2</sub> = 0.0632                              |
| Final R indexes [all data]                  | R <sub>1</sub> = 0.0569, wR <sub>2</sub> = 0.0691                              |
| Largest diff. peak/hole / e Å <sup>-3</sup> | 0.74/-1.10                                                                     |
| Flack parameter                             | -0.04(2)                                                                       |

**Table S2.** Fractional Atomic Coordinates (×10<sup>4</sup>) and Equivalent Isotropic Displacement Parameters (Å<sup>2</sup>×10<sup>3</sup>) for threoninePd. U<sub>eq</sub> is defined as 1/3 of the trace of the orthogonalised U<sub>ij</sub> tensor.



| Atom | x          | y          | z           | U(eq)     |
|------|------------|------------|-------------|-----------|
| Pd1  | 2219.6 (3) | 2543.5 (3) | 3494.7 (2)  | 8.49 (7)  |
| O12  | 1389 (3)   | 3130 (3)   | 2688.6 (14) | 10.5 (7)  |
| O22  | 1014 (3)   | 2578 (3)   | 1690.6 (14) | 17.5 (8)  |
| O32  | -196 (3)   | 306 (3)    | 2259.9 (15) | 13.5 (7)  |
| O42  | 2579 (3)   | 4154 (3)   | 3854.5 (15) | 11.8 (7)  |
| O52  | 3560 (3)   | 5052 (3)   | 4656.1 (16) | 15.7 (8)  |
| O62  | 5466 (3)   | 2680 (3)   | 4763.9 (16) | 15.4 (8)  |
| N12  | 1847 (4)   | 960 (4)    | 3101.4 (17) | 10.4 (8)  |
| N22  | 3126 (3)   | 1976 (4)   | 4272.6 (16) | 8.9 (8)   |
| C12  | 1363 (4)   | 2347 (5)   | 2233 (2)    | 12.1 (10) |
| C22  | 1827 (4)   | 1109 (4)   | 2403 (2)    | 10.2 (10) |
| C32  | 1088 (4)   | 144 (5)    | 2071 (2)    | 12.5 (10) |
| C42  | 1545 (4)   | -1084 (5)  | 2236 (2)    | 15.7 (11) |
| C52  | 3151 (4)   | 4145 (5)   | 4406 (2)    | 11.9 (10) |
| C62  | 3218 (4)   | 2962 (4)   | 4745 (2)    | 10.1 (10) |
| C72  | 4380 (4)   | 2816 (4)   | 5159 (2)    | 13.1 (11) |
| C82  | 4299 (5)   | 1725 (5)   | 5577 (2)    | 15.5 (11) |
| Pd2  | 5291.0 (3) | 5327.9 (3) | 3516.0 (2)  | 8.36 (7)  |
| O11  | 5259 (3)   | 3813 (3)   | 3019.0 (14) | 12.1 (7)  |
| O21  | 4337 (3)   | 2939 (3)   | 2198.2 (15) | 14.3 (8)  |
| O31  | 5148 (3)   | 5458 (3)   | 1531.6 (16) | 14.7 (7)  |
| O41  | 6399 (3)   | 4746 (3)   | 4229.7 (13) | 11.0 (7)  |
| O51  | 7282 (3)   | 5312 (3)   | 5134.6 (14) | 18.3 (8)  |
| O61  | 5248 (4)   | 7168 (3)   | 5398.0 (15) | 22.3 (9)  |
| N11  | 4206 (4)   | 5924 (3)   | 2805.1 (16) | 8.9 (8)   |
| N21  | 5294 (4)   | 6808 (4)   | 4045.0 (16) | 12.2 (8)  |
| C11  | 4501 (4)   | 3807 (4)   | 2541 (2)    | 10.1 (10) |
| C21  | 3775 (4)   | 4932 (4)   | 2400 (2)    | 9.8 (10)  |
| C31  | 3863 (4)   | 5233 (5)   | 1694.1 (19) | 11.3 (10) |
| C41  | 3105 (4)   | 6300 (4)   | 1504 (2)    | 15.6 (10) |
| C51  | 6724 (4)   | 5554 (5)   | 4640 (2)    | 12.9 (10) |
| C61  | 6415 (4)   | 6829 (5)   | 4460 (2)    | 13.0 (10) |
| C71  | 6243 (5)   | 7647 (5)   | 5032 (2)    | 15.6 (11) |
| C81  | 5976 (5)   | 8918 (5)   | 4858 (2)    | 20.7 (12) |
| O3W  | 8109 (3)   | 6286 (3)   | 6251.4 (15) | 15.4 (8)  |
| O2W  | 220 (4)    | 4835 (3)   | 1240.9 (15) | 21.3 (8)  |
| O1W  | -1885 (3)  | 1521 (3)   | 1493.1 (18) | 14.4 (7)  |

**Table S3 Anisotropic Displacement Parameters ( $\text{\AA}^2 \times 10^3$ ) for threoninePd.** The Anisotropic displacement factor exponent takes the form:  $-2\pi^2[h^2a^{*2}U_{11}+2hka^*b^*U_{12}+\dots]$ .

| Atom | U <sub>11</sub> | U <sub>22</sub> | U <sub>33</sub> | U <sub>23</sub> | U <sub>13</sub> | U <sub>12</sub> |
|------|-----------------|-----------------|-----------------|-----------------|-----------------|-----------------|
| Pd1  | 9.20 (14)       | 7.99 (18)       | 8.27 (12)       | 0.06 (15)       | -0.61 (14)      | -0.12 (14)      |
| O12  | 11.1 (16)       | 8.5 (18)        | 11.8 (14)       | 0.4 (13)        | -1.9 (12)       | 1.2 (14)        |
| O22  | 26.6 (19)       | 15 (2)          | 10.9 (13)       | 2.2 (15)        | -4.9 (14)       | 1.1 (18)        |
| O32  | 9.3 (15)        | 11.6 (19)       | 19.5 (15)       | 2.1 (15)        | -0.7 (14)       | -0.4 (16)       |
| O42  | 14.8 (17)       | 7.1 (18)        | 13.5 (14)       | 0.6 (13)        | -1.1 (13)       | -1.8 (14)       |
| O52  | 19.1 (18)       | 11 (2)          | 17.1 (16)       | -2.7 (14)       | 0.3 (15)        | -1.9 (15)       |
| O62  | 11.4 (17)       | 12 (2)          | 22.2 (16)       | 3.7 (15)        | 2.3 (14)        | 0.1 (16)        |
| N12  | 14 (2)          | 6 (2)           | 11.0 (16)       | -0.3 (15)       | -3.3 (15)       | -0.2 (17)       |
| N22  | 8.4 (18)        | 10 (2)          | 8.8 (15)        | 0.0 (15)        | -1.3 (14)       | -1.8 (16)       |
| C12  | 8 (2)           | 15 (3)          | 13.1 (18)       | 2.8 (19)        | 1.7 (16)        | 0 (2)           |
| C22  | 11 (2)          | 10 (3)          | 9.4 (18)        | 2.3 (17)        | -2.4 (17)       | -3 (2)          |
| C32  | 11 (2)          | 16 (3)          | 10.6 (18)       | -1.0 (18)       | 0.2 (17)        | -1 (2)          |
| C42  | 14 (2)          | 17 (3)          | 16 (2)          | -3 (2)          | 0.9 (19)        | 1 (2)           |
| C52  | 8 (2)           | 14 (3)          | 14 (2)          | -0.3 (19)       | 2.1 (17)        | 1 (2)           |
| C62  | 11 (2)          | 10 (3)          | 8.6 (18)        | -0.9 (17)       | -0.3 (17)       | 0 (2)           |
| C72  | 14 (2)          | 14 (3)          | 11.5 (19)       | 1.2 (18)        | -0.5 (17)       | -2 (2)          |
| C82  | 18 (2)          | 19 (3)          | 9.8 (19)        | 1 (2)           | -1.4 (18)       | -1 (2)          |

| Atom | U <sub>11</sub> | U <sub>22</sub> | U <sub>33</sub> | U <sub>23</sub> | U <sub>13</sub> | U <sub>12</sub> |
|------|-----------------|-----------------|-----------------|-----------------|-----------------|-----------------|
| Pd2  | 10.40 (14)      | 8.22 (18)       | 6.47 (11)       | -0.11 (14)      | -0.39 (14)      | 0.38 (14)       |
| O11  | 13.1 (16)       | 11.2 (19)       | 12.1 (14)       | -3.3 (13)       | -3.8 (14)       | 0.6 (16)        |
| O21  | 15.9 (18)       | 12 (2)          | 14.7 (15)       | -3.3 (13)       | -3.5 (13)       | 1.8 (15)        |
| O31  | 16.3 (15)       | 13.8 (18)       | 14.1 (13)       | 0.1 (15)        | 6.7 (15)        | 0.7 (14)        |
| O41  | 14.3 (16)       | 11.2 (19)       | 7.4 (12)        | -0.5 (13)       | -1.8 (12)       | 0.2 (15)        |
| O51  | 29 (2)          | 15 (2)          | 10.9 (13)       | -1.8 (14)       | -7.5 (15)       | 4.1 (19)        |
| O61  | 35 (2)          | 20 (2)          | 12.0 (14)       | -1.7 (14)       | 4.1 (16)        | -2.8 (19)       |
| N11  | 12.0 (19)       | 9 (2)           | 6.0 (15)        | 0.1 (14)        | 1.2 (14)        | 1.7 (17)        |
| N21  | 15.2 (19)       | 12 (2)          | 9.0 (15)        | -1.4 (15)       | -3.3 (16)       | 1.1 (19)        |
| C11  | 8 (2)           | 11 (3)          | 11.5 (18)       | -0.5 (17)       | 2.0 (17)        | -2 (2)          |
| C21  | 10 (2)          | 9 (3)           | 10.1 (18)       | -0.7 (17)       | 1.7 (16)        | -1.7 (19)       |
| C31  | 14 (2)          | 11 (3)          | 8.8 (16)        | -2.6 (18)       | 0.2 (16)        | -2 (2)          |
| C41  | 19 (2)          | 15 (3)          | 12.7 (18)       | 1 (2)           | -5 (2)          | -1 (2)          |
| C51  | 14 (2)          | 14 (3)          | 10.4 (19)       | 0.6 (18)        | 0.7 (17)        | 2 (2)           |
| C61  | 16 (2)          | 16 (3)          | 7.7 (17)        | 1.0 (19)        | -3.7 (17)       | -3 (2)          |
| C71  | 26 (3)          | 10 (3)          | 10.5 (19)       | 0.6 (18)        | -7.6 (18)       | -1 (2)          |
| C81  | 32 (3)          | 13 (3)          | 18 (2)          | -5 (2)          | -10 (2)         | 3 (3)           |
| O3W  | 18.8 (19)       | 16 (2)          | 11.6 (14)       | -1.9 (14)       | -3.3 (14)       | 5.3 (16)        |
| O2W  | 34 (2)          | 16 (2)          | 13.5 (14)       | 2.8 (14)        | -1.8 (16)       | 4.6 (19)        |
| O1W  | 17.7 (17)       | 11.2 (18)       | 14.3 (14)       | -0.8 (16)       | -4.4 (16)       | -0.1 (14)       |

Table S4. Bond Lengths for threoninePd.

| Atom | Atom | Length/Å  | Atom | Atom | Length/Å  |
|------|------|-----------|------|------|-----------|
| Pd1  | O12  | 2.027 (3) | Pd2  | O11  | 2.009 (3) |
| Pd1  | O42  | 2.012 (3) | Pd2  | O41  | 2.023 (3) |
| Pd1  | N12  | 2.015 (4) | Pd2  | N11  | 2.010 (4) |
| Pd1  | N22  | 2.009 (4) | Pd2  | N21  | 2.013 (4) |
| O12  | C12  | 1.307 (6) | O11  | C11  | 1.292 (5) |
| O22  | C12  | 1.230 (5) | O21  | C11  | 1.232 (5) |
| O32  | C32  | 1.440 (5) | O31  | C31  | 1.439 (5) |
| O42  | C52  | 1.312 (5) | O41  | C51  | 1.305 (6) |
| O52  | C52  | 1.233 (6) | O51  | C51  | 1.231 (5) |
| O62  | C72  | 1.435 (5) | O61  | C71  | 1.421 (6) |
| N12  | C22  | 1.481 (5) | N11  | C21  | 1.484 (6) |
| N22  | C62  | 1.498 (6) | N21  | C61  | 1.484 (6) |
| C12  | C22  | 1.528 (7) | C11  | C21  | 1.521 (7) |
| C22  | C32  | 1.518 (7) | C21  | C31  | 1.528 (6) |
| C32  | C42  | 1.514 (7) | C31  | C41  | 1.509 (7) |
| C52  | C62  | 1.519 (7) | C51  | C61  | 1.528 (7) |
| C62  | C72  | 1.526 (6) | C61  | C71  | 1.530 (7) |
| C72  | C82  | 1.520 (7) | C71  | C81  | 1.512 (7) |

Table S5. Bond Angles for threoninePd.

| Atom | Atom | Atom | Angle/°     | Atom | Atom | Atom | Angle/°     |
|------|------|------|-------------|------|------|------|-------------|
| O42  | Pd1  | O12  | 95.88 (13)  | O11  | Pd2  | O41  | 96.85 (13)  |
| O42  | Pd1  | N12  | 177.78 (14) | O11  | Pd2  | N11  | 83.62 (14)  |
| N12  | Pd1  | O12  | 81.98 (15)  | O11  | Pd2  | N21  | 177.61 (14) |
| N22  | Pd1  | O12  | 177.13 (14) | N11  | Pd2  | O41  | 179.23 (16) |
| N22  | Pd1  | O42  | 83.73 (15)  | N11  | Pd2  | N21  | 97.66 (15)  |
| N22  | Pd1  | N12  | 98.39 (16)  | N21  | Pd2  | O41  | 81.89 (14)  |
| C12  | O12  | Pd1  | 113.7 (3)   | C11  | O11  | Pd2  | 114.9 (3)   |
| C52  | O42  | Pd1  | 114.6 (3)   | C51  | O41  | Pd2  | 114.8 (3)   |
| C22  | N12  | Pd1  | 108.0 (3)   | C21  | N11  | Pd2  | 110.7 (3)   |
| C62  | N22  | Pd1  | 109.5 (3)   | C61  | N21  | Pd2  | 109.9 (3)   |
| O12  | C12  | C22  | 116.3 (4)   | O11  | C11  | C21  | 117.8 (4)   |
| O22  | C12  | O12  | 122.9 (5)   | O21  | C11  | O11  | 123.4 (4)   |
| O22  | C12  | C22  | 120.7 (4)   | O21  | C11  | C21  | 118.8 (4)   |

| Atom | Atom | Atom | Angle/°   | Atom | Atom | Atom | Angle/°   |
|------|------|------|-----------|------|------|------|-----------|
| N12  | C22  | C12  | 110.0 (4) | N11  | C21  | C11  | 111.3 (4) |
| N12  | C22  | C32  | 112.5 (4) | N11  | C21  | C31  | 111.8 (4) |
| C32  | C22  | C12  | 112.6 (4) | C11  | C21  | C31  | 110.2 (4) |
| O32  | C32  | C22  | 106.1 (4) | O31  | C31  | C21  | 109.2 (4) |
| O32  | C32  | C42  | 111.1 (4) | O31  | C31  | C41  | 107.9 (4) |
| C42  | C32  | C22  | 112.9 (4) | C41  | C31  | C21  | 113.8 (4) |
| O42  | C52  | C62  | 116.3 (4) | O41  | C51  | C61  | 116.1 (4) |
| O52  | C52  | O42  | 122.5 (5) | O51  | C51  | O41  | 122.2 (5) |
| O52  | C52  | C62  | 121.1 (4) | O51  | C51  | C61  | 121.6 (4) |
| N22  | C62  | C52  | 110.1 (4) | N21  | C61  | C51  | 107.8 (4) |
| N22  | C62  | C72  | 110.6 (4) | N21  | C61  | C71  | 112.1 (4) |
| C52  | C62  | C72  | 113.7 (4) | C51  | C61  | C71  | 113.8 (4) |
| O62  | C72  | C62  | 109.8 (4) | O61  | C71  | C61  | 106.6 (4) |
| O62  | C72  | C82  | 107.2 (4) | O61  | C71  | C81  | 110.7 (4) |
| C82  | C72  | C62  | 112.0 (4) | C81  | C71  | C61  | 114.1 (4) |

Table S6. Hydrogen Bonds for threoninePd.

| D   | H    | A                | d(D-H)/Å | d(H-A)/Å | d(D-A)/Å  | D-H-A/° |
|-----|------|------------------|----------|----------|-----------|---------|
| O32 | H32  | O12 <sup>1</sup> | 0.82     | 1.97     | 2.777 (5) | 169.1   |
| O62 | H62  | O41              | 0.82     | 1.97     | 2.781 (5) | 171.0   |
| N12 | H12A | O3W <sup>2</sup> | 0.89     | 2.37     | 3.185 (5) | 152.1   |
| N12 | H12B | O2W <sup>1</sup> | 0.89     | 2.04     | 2.901 (5) | 161.5   |
| N22 | H22A | O51 <sup>2</sup> | 0.89     | 2.15     | 3.014 (5) | 162.7   |
| N22 | H22B | O31 <sup>3</sup> | 0.89     | 2.30     | 3.037 (5) | 139.9   |
| O31 | H31  | O3W <sup>4</sup> | 0.82     | 2.00     | 2.778 (5) | 158.9   |
| N11 | H11A | O1W <sup>5</sup> | 0.89     | 2.12     | 2.965 (5) | 157.2   |
| N11 | H11B | O21 <sup>6</sup> | 0.89     | 2.08     | 2.762 (5) | 132.4   |
| N21 | H21A | O21 <sup>6</sup> | 0.89     | 2.20     | 2.941 (5) | 140.8   |
| N21 | H21B | O52              | 0.89     | 2.44     | 3.008 (5) | 122.2   |
| O3W | H3WA | O1W <sup>7</sup> | 0.85     | 2.01     | 2.853 (5) | 172.8   |
| O3W | H3WB | O51              | 0.85     | 1.92     | 2.743 (5) | 163.3   |
| O2W | H2WA | O22              | 0.85     | 2.03     | 2.854 (5) | 164.7   |
| O2W | H2WB | O61 <sup>8</sup> | 0.85     | 2.26     | 2.923 (5) | 134.6   |
| O1W | H1WA | O42 <sup>1</sup> | 0.85     | 2.08     | 2.876 (5) | 155.0   |
| O1W | H1WB | O32              | 0.85     | 1.95     | 2.785 (5) | 168.4   |

<sup>1</sup>-X,-1/2+Y,1/2-Z; <sup>2</sup>-1/2+X,1/2-Y,1-Z; <sup>3</sup>1-X,-1/2+Y,1/2-Z; <sup>4</sup>3/2-X,1-Y,-1/2+Z; <sup>5</sup>-X,1/2+Y,1/2-Z; <sup>6</sup>1-X,1/2+Y,1/2-Z; <sup>7</sup>1/2-X,1-Y,1/2+Z;  
<sup>8</sup>1/2-X,1-Y,-1/2+Z.

Table S7. Torsion Angles for threoninePd.

| A   | B   | C   | D   | Angle/°    | A   | B   | C   | D   | Angle/°    |
|-----|-----|-----|-----|------------|-----|-----|-----|-----|------------|
| Pd1 | O12 | C12 | O22 | -172.4 (4) | Pd2 | O11 | C11 | O21 | -177.7 (3) |
| Pd1 | O12 | C12 | C22 | 6.1 (5)    | Pd2 | O11 | C11 | C21 | 2.1 (5)    |
| Pd1 | O42 | C52 | O52 | 171.8 (4)  | Pd2 | O41 | C51 | O51 | 172.1 (4)  |
| Pd1 | O42 | C52 | C62 | -11.8 (5)  | Pd2 | O41 | C51 | C61 | -10.1 (5)  |
| Pd1 | N12 | C22 | C12 | -31.6 (4)  | Pd2 | N11 | C21 | C11 | -13.1 (4)  |
| Pd1 | N12 | C22 | C32 | -157.9 (3) | Pd2 | N11 | C21 | C31 | -136.8 (3) |
| Pd1 | N22 | C62 | C52 | -25.0 (4)  | Pd2 | N21 | C61 | C51 | -32.7 (4)  |
| Pd1 | N22 | C62 | C72 | -151.5 (3) | Pd2 | N21 | C61 | C71 | -158.7 (3) |
| O12 | C12 | C22 | N12 | 17.5 (6)   | O11 | C11 | C21 | N11 | 7.5 (6)    |
| O12 | C12 | C22 | C32 | 143.7 (4)  | O11 | C11 | C21 | C31 | 132.2 (4)  |
| O22 | C12 | C22 | N12 | -164.0 (4) | O21 | C11 | C21 | N11 | -172.7 (4) |
| O22 | C12 | C22 | C32 | -37.8 (6)  | O21 | C11 | C21 | C31 | -48.1 (6)  |
| O42 | C52 | C62 | N22 | 24.8 (6)   | O41 | C51 | C61 | N21 | 28.6 (5)   |
| O42 | C52 | C62 | C72 | 149.5 (4)  | O41 | C51 | C61 | C71 | 153.5 (4)  |
| O52 | C52 | C62 | N22 | -158.7 (4) | O51 | C51 | C61 | N21 | -153.6 (4) |
| O52 | C52 | C62 | C72 | -34.0 (6)  | O51 | C51 | C61 | C71 | -28.7 (7)  |
| N12 | C22 | C32 | O32 | 66.7 (5)   | N11 | C21 | C31 | O31 | 61.6 (5)   |

| A   | B   | C   | D   | Angle/°   | A   | B   | C   | D   | Angle/°   |
|-----|-----|-----|-----|-----------|-----|-----|-----|-----|-----------|
| N12 | C22 | C32 | C42 | -55.2 (5) | N11 | C21 | C31 | C41 | -59.0 (5) |
| N22 | C62 | C72 | O62 | 53.1 (5)  | N21 | C61 | C71 | O61 | 63.4 (5)  |
| N22 | C62 | C72 | C82 | -65.8 (5) | N21 | C61 | C71 | C81 | -59.1 (6) |
| C12 | C22 | C32 | O32 | -58.2 (5) | C11 | C21 | C31 | O31 | -62.7 (5) |
| C12 | C22 | C32 | C42 | 179.9 (4) | C11 | C21 | C31 | C41 | 176.6 (4) |
| C52 | C62 | C72 | O62 | -71.3 (5) | C51 | C61 | C71 | O61 | -59.2 (5) |
| C52 | C62 | C72 | C82 | 169.8 (4) | C51 | C61 | C71 | C81 | 178.3 (4) |

Table S8. Hydrogen Atom Coordinates ( $\text{\AA} \times 10^4$ ) and Isotropic Displacement Parameters ( $\text{\AA}^2 \times 10^3$ ) for threoninePd.

| Atom | x        | y        | z       | U(eq) |
|------|----------|----------|---------|-------|
| H32  | -518.22  | -339.95  | 2325.13 | 20    |
| H62  | 5687.59  | 3328.9   | 4632.59 | 23    |
| H12A | 2431.86  | 439.49   | 3211.1  | 12    |
| H12B | 1109.13  | 695.13   | 3236.66 | 12    |
| H22A | 2715.47  | 1370.56  | 4443.53 | 11    |
| H22B | 3889.62  | 1730.52  | 4166.97 | 11    |
| H22  | 2693.38  | 1049.77  | 2254.27 | 12    |
| H32A | 1153.36  | 257.46   | 1611.02 | 15    |
| H42A | 1412.07  | -1229.97 | 2679.88 | 24    |
| H42B | 2421.19  | -1145.52 | 2141.45 | 24    |
| H42C | 1090.38  | -1655.85 | 1990.56 | 24    |
| H62A | 2487.14  | 2908.16  | 5023.9  | 12    |
| H72  | 4481.1   | 3516.82  | 5426.37 | 16    |
| H82A | 4277.23  | 1031.33  | 5315.92 | 23    |
| H82B | 3552.86  | 1762.46  | 5830.24 | 23    |
| H82C | 5017.4   | 1693.77  | 5850.94 | 23    |
| H31  | 5512.65  | 4828.86  | 1476.25 | 22    |
| H61  | 4701.88  | 6917.54  | 5160.09 | 33    |
| H11A | 3546.64  | 6299.62  | 2965.85 | 11    |
| H11B | 4637.08  | 6435.53  | 2570.2  | 11    |
| H21A | 5297.33  | 7438.49  | 3792.34 | 15    |
| H21B | 4605.09  | 6834.57  | 4282.09 | 15    |
| H21  | 2892.7   | 4783.94  | 2499.82 | 12    |
| H31A | 3569.79  | 4551.58  | 1448.42 | 14    |
| H41A | 3421.54  | 6985.81  | 1718.65 | 23    |
| H41B | 2244.9   | 6180.33  | 1618.47 | 23    |
| H41C | 3166.48  | 6414.17  | 1053.06 | 23    |
| H61A | 7115.33  | 7134.58  | 4208.82 | 16    |
| H71  | 7008.39  | 7623.84  | 5288.03 | 19    |
| H81A | 5225.14  | 8956.39  | 4608.62 | 31    |
| H81B | 6663.14  | 9229.45  | 4616.94 | 31    |
| H81C | 5869.94  | 9375.02  | 5238.29 | 31    |
| H3WA | 7727.83  | 6915.47  | 6355.7  | 23    |
| H3WB | 7838.86  | 6128.56  | 5881.19 | 23    |
| H2WA | 543.7    | 4237.03  | 1421.75 | 32    |
| H2WB | 78.59    | 4606.77  | 862.86  | 32    |
| H1WA | -2136.96 | 926.97   | 1281.52 | 22    |
| H1WB | -1323.69 | 1244.8   | 1737.62 | 22    |

## Experimental

Single crystals of  $\text{C}_{16}\text{H}_{38}\text{N}_4\text{O}_{15}\text{Pd}_2$  [**threoninePd**] were grown by allowing an acetone/water solution to evaporate slowly. A suitable crystal was selected and mounted on a fiber on a Xcalibur, Sapphire3, Gemini ultra diffractometer. The crystal was kept at 100.00(10) K during data collection. Using Olex2 [1], the structure was solved with the SHELXT [2] structure solution program using Intrinsic Phasing and refined with the SHELXL [3] refinement package using Least Squares minimisation.

1. Dolomanov, O.V., Bourhis, L.J., Gildea, R.J., Howard, J.A.K. & Puschmann, H. (2009), J. Appl. Cryst. 42, 339-341.
2. Sheldrick, G.M. (2015). Acta Cryst. A71, 3-8.
3. Sheldrick, G.M. (2015). Acta Cryst. C71, 3-8.

### Crystal structure determination of [threoninePd]

**Crystal Data** for  $C_{16}H_{38}N_4O_{15}Pd_2$  ( $M = 739.30$  g/mol): orthorhombic, space group  $P2_12_12_1$  (no. 19),  $a = 10.6869(2)$  Å,  $b = 11.3234(3)$  Å,  $c = 21.0572(3)$  Å,  $V = 2548.17(9)$  Å<sup>3</sup>,  $Z = 4$ ,  $T = 100.00(10)$  K,  $\mu(\text{Mo K}\alpha) = 1.490$  mm<sup>-1</sup>,  $D_{\text{calc}} = 1.927$  g/cm<sup>3</sup>, 22934 reflections measured ( $6.516^\circ \leq 2\theta \leq 65.618^\circ$ ), 8597 unique ( $R_{\text{int}} = 0.0555$ ,  $R_{\text{sigma}} = 0.0814$ ) which were used in all calculations. The final  $R_1$  was 0.0404 ( $I > 2\sigma(I)$ ) and  $wR_2$  was 0.0691 (all data).

### Refinement model description

Number of restraints - 0, number of constraints - unknown.

Details:

1. Fixed Uiso

At 1.2 times of:

All C(H) groups, All N(H,H) groups

At 1.5 times of:

All C(H,H,H) groups, All O(H) groups, All O(H,H) groups

2.a Free rotating group:

O3W(H3WA,H3WB), O2W(H2WA,H2WB), O1W(H1WA,H1WB)

2.b Ternary CH refined with riding coordinates:

C22(H22), C32(H32A), C62(H62A), C72(H72), C21(H21), C31(H31A), C61(H61A), C71(H71)

2.c Secondary CH2 refined with riding coordinates:

N12(H12A,H12B), N22(H22A,H22B), N11(H11A,H11B), N21(H21A,H21B)

2.d Idealised Me refined as rotating group:

C42(H42A,H42B,H42C), C82(H82A,H82B,H82C), C41(H41A,H41B,H41C), C81(H81A,H81B,H81C)

2.e Idealised tetrahedral OH refined as rotating group:

O32(H32), O62(H62), O31(H31), O61(H61)

## F. Complex (17) cis-bis-(aspartate)palladium(II)

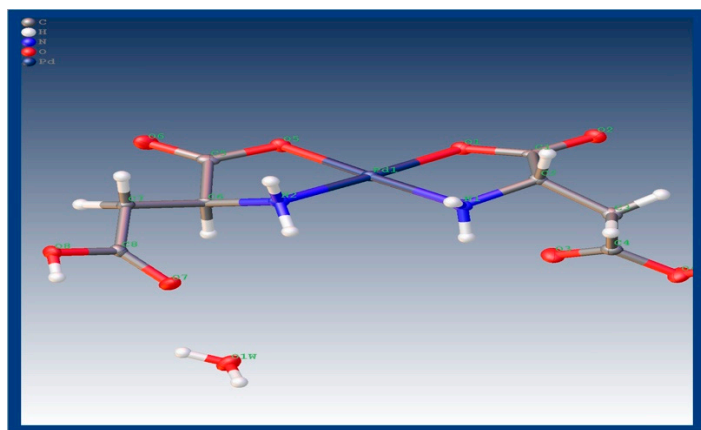

Table S1. Crystal data and structure refinement for dh1-47abs.

| Identification code   | dh1-47abs           |
|-----------------------|---------------------|
| Empirical formula     | $C_8H_{14}N_2O_9Pd$ |
| Formula weight        | 388.61              |
| Temperature/K         | 100.1               |
| Crystal system        | monoclinic          |
| Space group           | $P2_1$              |
| a/Å                   | 10.4449(3)          |
| b/Å                   | 5.22088(12)         |
| c/Å                   | 11.6215(3)          |
| $\alpha/^\circ$       | 90                  |
| $\beta/^\circ$        | 105.340(3)          |
| $\gamma/^\circ$       | 90                  |
| Volume/Å <sup>3</sup> | 611.16(3)           |
| Z                     | 2                   |

|                                                |                                                               |
|------------------------------------------------|---------------------------------------------------------------|
| $\rho_{\text{calc}}/\text{cm}^3$               | 2.112                                                         |
| $\mu/\text{mm}^{-1}$                           | 1.568                                                         |
| F(000)                                         | 388.0                                                         |
| Crystal size/mm <sup>3</sup>                   | $0.1677 \times 0.0841 \times 0.0605$                          |
| Radiation                                      | Mo K $\alpha$ ( $\lambda = 0.71073$ )                         |
| 2 $\theta$ range for data collection/ $^\circ$ | 7.272 to 60.108                                               |
| Index ranges                                   | $-14 \leq h \leq 14, -7 \leq k \leq 7, -16 \leq l \leq 16$    |
| Reflections collected                          | 11992                                                         |
| Independent reflections                        | 3571 [ $R_{\text{int}} = 0.0415, R_{\text{sigma}} = 0.0443$ ] |
| Data/restraints/parameters                     | 3571/1/193                                                    |
| Goodness-of-fit on $F^2$                       | 1.018                                                         |
| Final R indexes [ $I \geq 2\sigma(I)$ ]        | $R_1 = 0.0233, wR_2 = 0.0432$                                 |
| Final R indexes [all data]                     | $R_1 = 0.0275, wR_2 = 0.0446$                                 |
| Largest diff. peak/hole / e $\text{\AA}^{-3}$  | 0.76/-0.44                                                    |
| Flack parameter                                | -0.034(19)                                                    |

**Table S2.** Fractional Atomic Coordinates ( $\times 10^4$ ) and Equivalent Isotropic Displacement Parameters ( $\text{\AA}^2 \times 10^3$ ) for dh1-47abs.  $U_{\text{eq}}$  is defined as 1/3 of the trace of the orthogonalised  $U_{ij}$  tensor.

| Atom | x           | y           | z          | $U_{\text{eq}}$ |
|------|-------------|-------------|------------|-----------------|
| Pd1  | 10138.8 (2) | 17274.3 (6) | 3085.6 (2) | 8.99 (6)        |
| O1   | 11708 (3)   | 19404 (5)   | 2905 (2)   | 12.1 (5)        |
| O2   | 13595 (3)   | 19092 (5)   | 2360 (2)   | 14.9 (6)        |
| O3   | 11017 (3)   | 17965 (5)   | 75 (2)     | 18.3 (7)        |
| O4   | 12293 (3)   | 16490 (5)   | -1015 (2)  | 19.5 (7)        |
| O5   | 9484 (3)    | 19886 (5)   | 4072 (2)   | 12.7 (5)        |
| O6   | 7834 (3)    | 20539 (5)   | 4924 (2)   | 17.8 (6)        |
| O7   | 5858 (3)    | 13264 (5)   | 2363 (2)   | 19.5 (6)        |
| O8   | 4946 (3)    | 12640 (6)   | 3879 (2)   | 14.7 (7)        |
| N1   | 10840 (3)   | 14708 (6)   | 2117 (3)   | 10.8 (6)        |
| N2   | 8603 (3)    | 15214 (5)   | 3316 (3)   | 10.1 (6)        |
| C1   | 12531 (4)   | 18149 (7)   | 2470 (3)   | 9.6 (7)         |
| C2   | 12231 (4)   | 15376 (7)   | 2139 (3)   | 9.6 (7)         |
| C3   | 12562 (4)   | 14695 (7)   | 971 (3)    | 11.3 (7)        |
| C4   | 11895 (4)   | 16524 (7)   | -12 (3)    | 12.6 (8)        |
| C5   | 8342 (4)    | 19309 (7)   | 4270 (3)   | 11.7 (7)        |
| C6   | 7606 (3)    | 17034 (10)  | 3554 (3)   | 10.3 (7)        |
| C7   | 6609 (4)    | 15819 (7)   | 4137 (3)   | 10.7 (7)        |
| C8   | 5785 (4)    | 13798 (7)   | 3367 (3)   | 10.8 (7)        |
| O1W  | 5312 (3)    | 9219 (6)    | 633 (3)    | 20.6 (6)        |

**Table S3.** Anisotropic Displacement Parameters ( $\text{\AA}^2 \times 10^3$ ) for dh1-47abs. The Anisotropic displacement factor exponent takes the form:  $-2\pi^2[h^2a^{*2}U_{11}+2hka^*b^*U_{12}+\dots]$ .

| Atom | $U_{11}$  | $U_{22}$  | $U_{33}$   | $U_{23}$  | $U_{13}$  | $U_{12}$   |
|------|-----------|-----------|------------|-----------|-----------|------------|
| Pd1  | 9.57 (10) | 6.51 (10) | 10.16 (10) | 0.06 (14) | 1.34 (8)  | -1.30 (16) |
| O1   | 12.7 (13) | 9.1 (12)  | 13.9 (13)  | 1.6 (10)  | 2.4 (11)  | -1.8 (11)  |
| O2   | 13.4 (14) | 14.5 (13) | 16.9 (14)  | -1.6 (10) | 4.1 (11)  | -5.3 (11)  |
| O3   | 15.9 (14) | 22.3 (17) | 15.8 (13)  | 5.9 (10)  | 2.7 (12)  | 5.0 (11)   |
| O4   | 21.3 (16) | 24.9 (17) | 13.2 (13)  | 5.0 (10)  | 6.2 (12)  | 5.0 (11)   |
| O5   | 12.2 (14) | 9.1 (13)  | 16.6 (14)  | -1.9 (10) | 3.3 (12)  | -1.0 (10)  |
| O6   | 16.0 (15) | 14.3 (14) | 21.5 (15)  | -6.8 (11) | 2.2 (12)  | 2.4 (12)   |
| O7   | 17.6 (15) | 27.8 (15) | 13.9 (13)  | -8.1 (11) | 5.9 (12)  | -6.8 (11)  |
| O8   | 11.6 (12) | 18 (2)    | 15.3 (12)  | -2.0 (12) | 5.4 (10)  | -4.0 (12)  |
| N1   | 11.0 (16) | 7.7 (14)  | 13.0 (15)  | 0.8 (11)  | 1.7 (13)  | -2.0 (12)  |
| N2   | 12.1 (16) | 5.2 (14)  | 12.0 (15)  | -0.9 (11) | 1.6 (13)  | 0.6 (12)   |
| C1   | 11.5 (19) | 9.2 (16)  | 6.0 (17)   | 1.7 (12)  | -1.4 (15) | 0.9 (13)   |
| C2   | 8.3 (18)  | 7.9 (18)  | 11.6 (19)  | 1.2 (14)  | 0.8 (15)  | 0.3 (14)   |
| C3   | 11.7 (18) | 7.7 (16)  | 13.8 (18)  | 2.8 (13)  | 2.2 (15)  | 0.7 (14)   |

| Atom | U <sub>11</sub> | U <sub>22</sub> | U <sub>33</sub> | U <sub>23</sub> | U <sub>13</sub> | U <sub>12</sub> |
|------|-----------------|-----------------|-----------------|-----------------|-----------------|-----------------|
| C4   | 13.2 (19)       | 11.8 (18)       | 11.6 (17)       | 1.4 (12)        | 1.1 (15)        | -1.3 (13)       |
| C5   | 12.2 (18)       | 8.5 (17)        | 11.7 (18)       | 1.4 (13)        | -1.6 (15)       | 1.8 (14)        |
| C6   | 9.9 (14)        | 9 (2)           | 11.6 (14)       | -2.9 (17)       | 1.9 (11)        | -5.8 (19)       |
| C7   | 10.7 (18)       | 11.4 (17)       | 9.4 (17)        | -2.4 (13)       | 1.5 (14)        | -0.3 (14)       |
| C8   | 8.3 (17)        | 9.0 (16)        | 15.0 (18)       | 0.2 (13)        | 2.8 (14)        | 0.7 (14)        |
| O1W  | 25.0 (17)       | 21.6 (15)       | 17.3 (15)       | -7.1 (12)       | 9.4 (13)        | -5.4 (13)       |

Table S4. Bond Lengths for dh1-47abs.

| Atom | Atom | Length/Å  | Atom | Atom | Length/Å  |
|------|------|-----------|------|------|-----------|
| Pd1  | O1   | 2.037 (3) | O7   | C8   | 1.222 (4) |
| Pd1  | O5   | 2.014 (3) | O8   | C8   | 1.328 (4) |
| Pd1  | N1   | 2.009 (3) | N1   | C2   | 1.488 (5) |
| Pd1  | N2   | 2.008 (3) | N2   | C6   | 1.488 (5) |
| O1   | C1   | 1.286 (5) | C1   | C2   | 1.510 (6) |
| O2   | C1   | 1.253 (5) | C2   | C3   | 1.529 (5) |
| O3   | C4   | 1.211 (4) | C3   | C4   | 1.510 (5) |
| O4   | C4   | 1.337 (4) | C5   | C6   | 1.535 (6) |
| O5   | C5   | 1.309 (4) | C6   | C7   | 1.523 (5) |
| O6   | C5   | 1.219 (4) | C7   | C8   | 1.499 (5) |

Table S5. Bond Angles for dh1-47abs.

| Atom | Atom | Atom | Angle/°     | Atom | Atom | Atom | Angle/°   |
|------|------|------|-------------|------|------|------|-----------|
| O5   | Pd1  | O1   | 95.30 (11)  | C1   | C2   | C3   | 111.7 (3) |
| N1   | Pd1  | O1   | 83.33 (11)  | C4   | C3   | C2   | 111.0 (3) |
| N1   | Pd1  | O5   | 178.49 (13) | O3   | C4   | O4   | 119.9 (3) |
| N2   | Pd1  | O1   | 178.19 (12) | O3   | C4   | C3   | 122.5 (3) |
| N2   | Pd1  | O5   | 83.28 (11)  | O4   | C4   | C3   | 117.6 (3) |
| N2   | Pd1  | N1   | 98.07 (12)  | O5   | C5   | C6   | 115.6 (3) |
| C1   | O1   | Pd1  | 113.7 (2)   | O6   | C5   | O5   | 123.8 (3) |
| C5   | O5   | Pd1  | 114.0 (2)   | O6   | C5   | C6   | 120.5 (3) |
| C2   | N1   | Pd1  | 109.5 (2)   | N2   | C6   | C5   | 108.7 (3) |
| C6   | N2   | Pd1  | 107.8 (2)   | N2   | C6   | C7   | 114.3 (4) |
| O1   | C1   | C2   | 118.3 (4)   | C7   | C6   | C5   | 112.6 (3) |
| O2   | C1   | O1   | 122.9 (3)   | C8   | C7   | C6   | 112.3 (3) |
| O2   | C1   | C2   | 118.7 (4)   | O7   | C8   | O8   | 122.6 (3) |
| N1   | C2   | C1   | 111.4 (3)   | O7   | C8   | C7   | 124.1 (3) |
| N1   | C2   | C3   | 112.3 (3)   | O8   | C8   | C7   | 113.3 (3) |

Table S6. Hydrogen Bonds for dh1-47abs.

| D   | H    | A                | d(D-H)/Å | d(H-A)/Å | d(D-A)/Å  | D-H-A/° |
|-----|------|------------------|----------|----------|-----------|---------|
| O4  | H4   | O1W <sup>1</sup> | 0.77 (5) | 1.96 (5) | 2.697 (4) | 161 (5) |
| O8  | H8   | O2 <sup>2</sup>  | 0.79 (4) | 1.90 (4) | 2.687 (4) | 173 (5) |
| N1  | H1A  | O1 <sup>3</sup>  | 0.89     | 2.17     | 2.982 (4) | 150.4   |
| N1  | H1B  | O3 <sup>4</sup>  | 0.89     | 2.09     | 2.909 (4) | 151.8   |
| N2  | H2B  | O5 <sup>3</sup>  | 0.89     | 2.31     | 2.988 (4) | 133.4   |
| O1W | H1WA | O1W <sup>5</sup> | 0.88 (5) | 2.10 (5) | 2.982 (3) | 175 (4) |
| O1W | H1WB | O2 <sup>2</sup>  | 0.82 (5) | 2.22 (5) | 3.025 (4) | 169 (5) |

<sup>1</sup>2-X,1/2+Y,-Z; <sup>2</sup>1+X,-1+Y,+Z; <sup>3</sup>X,-1+Y,+Z; <sup>4</sup>2-X,-1/2+Y,-Z; <sup>5</sup>1-X,-1/2+Y,-Z.

Table S7. Torsion Angles for dh1-47abs.

| A   | B  | C  | D  | Angle/°    | A  | B  | C  | D  | Angle/°    |
|-----|----|----|----|------------|----|----|----|----|------------|
| Pd1 | O1 | C1 | O2 | -175.7 (3) | O5 | C5 | C6 | N2 | 30.2 (4)   |
| Pd1 | O1 | C1 | C2 | 1.0 (4)    | O5 | C5 | C6 | C7 | 157.8 (3)  |
| Pd1 | O5 | C5 | O6 | 174.0 (3)  | O6 | C5 | C6 | N2 | -153.6 (3) |
| Pd1 | O5 | C5 | C6 | -9.9 (4)   | O6 | C5 | C6 | C7 | -26.0 (5)  |
| Pd1 | N1 | C2 | C1 | -20.5 (3)  | N1 | C2 | C3 | C4 | 73.0 (4)   |

| A   | B  | C  | D  | Angle/°    | A  | B  | C  | D  | Angle/°   |
|-----|----|----|----|------------|----|----|----|----|-----------|
| Pd1 | N1 | C2 | C3 | -146.6 (2) | N2 | C6 | C7 | C8 | -61.9 (4) |
| Pd1 | N2 | C6 | C5 | -34.5 (3)  | C1 | C2 | C3 | C4 | -53.0 (4) |
| Pd1 | N2 | C6 | C7 | -161.2 (2) | C2 | C3 | C4 | O3 | -13.8 (5) |
| O1  | C1 | C2 | N1 | 13.3 (5)   | C2 | C3 | C4 | O4 | 167.2 (3) |
| O1  | C1 | C2 | C3 | 139.7 (3)  | C5 | C6 | C7 | C8 | 173.5 (3) |
| O2  | C1 | C2 | N1 | -169.8 (3) | C6 | C7 | C8 | O7 | -3.3 (5)  |
| O2  | C1 | C2 | C3 | -43.4 (5)  | C6 | C7 | C8 | O8 | 177.4 (3) |

Table S8 Hydrogen Atom Coordinates ( $\text{\AA} \times 10^4$ ) and Isotropic Displacement Parameters ( $\text{\AA}^2 \times 10^3$ ) for dh1-47abs.

| Atom | x          | y          | z          | U(eq) |
|------|------------|------------|------------|-------|
| H4   | 12880 (50) | 15600 (90) | -1010 (40) | 29    |
| H8   | 4600 (50)  | 11600 (90) | 3400 (40)  | 22    |
| H1A  | 10814.08   | 13146.07   | 2416.65    | 13    |
| H1B  | 10336.46   | 14710.58   | 1367.84    | 13    |
| H2A  | 8245.04    | 14298.27   | 2664.79    | 12    |
| H2B  | 8875.68    | 14144.84   | 3928.64    | 12    |
| H2   | 12812.51   | 14340.4    | 2768.38    | 11    |
| H3A  | 13515.62   | 14763.14   | 1087.21    | 14    |
| H3B  | 12269.25   | 12961.13   | 741.22     | 14    |
| H6   | 7100.62    | 17705.82   | 2779.51    | 12    |
| H7A  | 7081.8     | 15062.41   | 4892.49    | 13    |
| H7B  | 6028.54    | 17140.1    | 4301.18    | 13    |
| H1WA | 5150 (40)  | 7690 (100) | 300 (40)   | 31    |
| H1WB | 4920 (50)  | 9340 (100) | 1150 (40)  | 31    |

## Experimental

Single crystals of  $\text{C}_8\text{H}_{14}\text{N}_2\text{O}_9\text{Pd}$  [dh1-47abs] were grown by allowing an acetone/water solution to evaporate slowly. A suitable crystal was selected and mounted on a fiber on a Xcalibur, Sapphire3, Gemini ultra diffractometer. The crystal was kept at 100.1 K during data collection. Using Olex2 [1], the structure was solved with the SHELXT [2] structure solution program using Intrinsic Phasing and refined with the SHELXL [3] refinement package using Least Squares minimisation.

1. Dolomanov, O.V., Bourhis, L.J., Gildea, R.J., Howard, J.A.K. & Puschmann, H. (2009), J. Appl. Cryst. 42, 339-341.
2. Sheldrick, G.M. (2015). Acta Cryst. A71, 3-8.
3. Sheldrick, G.M. (2015). Acta Cryst. C71, 3-8.

## Crystal structure determination of [dh1-47abs]

**Crystal Data** for  $\text{C}_8\text{H}_{14}\text{N}_2\text{O}_9\text{Pd}$  ( $M = 388.61$  g/mol): monoclinic, space group  $P2_1$  (no. 4),  $a = 10.4449(3)$  Å,  $b = 5.22088(12)$  Å,  $c = 11.6215(3)$  Å,  $\beta = 105.340(3)^\circ$ ,  $V = 611.16(3)$  Å<sup>3</sup>,  $Z = 2$ ,  $T = 100.1$  K,  $\mu(\text{Mo K}\alpha) = 1.568$  mm<sup>-1</sup>,  $D_{\text{calc}} = 2.112$  g/cm<sup>3</sup>, 11992 reflections measured ( $7.272^\circ \leq 2\theta \leq 60.108^\circ$ ), 3571 unique ( $R_{\text{int}} = 0.0415$ ,  $R_{\text{sigma}} = 0.0443$ ) which were used in all calculations. The final  $R_1$  was 0.0233 ( $I > 2\sigma(I)$ ) and  $wR_2$  was 0.0446 (all data).

## Refinement model description

Number of restraints - 1, number of constraints - unknown.

Details:

1. Fixed Uiso

At 1.2 times of:

All C(H) groups, All C(H,H) groups, All N(H,H) groups

At 1.5 times of:

All O(H) groups, All O(H,H) groups

2.a Ternary CH refined with riding coordinates:

C2 (H2), C6 (H6)

2.b Secondary CH2 refined with riding coordinates:

N1 (H1A, H1B), N2 (H2A, H2B), C3 (H3A, H3B), C7 (H7A, H7B)
